# Supplementary material for: Molluscan Compounds Provide Drug Leads for the Treatment and Prevention of Respiratory Disease
Source: MDPI journal article supplement (doi:10.3390/md18110570), 2020-11-19
Supplement: s1 [file s1]

*Review*

## **Molluscan Compounds Provide Drug Leads for the Treatment and Prevention of Respiratory Disease**

Kate Summer, Jessica Browne, Lei Liu and Kirsten Benkendorff

### **Supplementary information**

---

#### **Database search criteria**

Databases Scopus, Web of Science and PubMed were searched for biomedical literature using search strings “mollusc OR mollusk OR molluscan OR hemocyanin OR haemocyanin” AND “antimicrobial OR antibacterial OR antiviral OR anti-inflammatory OR vaccine OR (lung AND cancer)” AND “in-vitro OR in-vivo OR (clinical AND trial)”, which returned 861 hits minus duplicates (as of October, 2020). Additional targeted searches included “mollusc OR mollusk OR hemocyanin OR klh” AND “asthma OR copd OR bronchitis OR influenza OR pneumonia OR tuberculosis OR (respiratory AND disease)” and key respiratory pathogens including “(mycobacterium AND tuberculosis) OR pneumoniae OR (haemophilus AND influenzae) OR rhinovirus OR adenovirus OR (moraxella AND catarrhalis) OR (pseudomonas AND aeruginosa)”.

For literature regarding traditional medicinal applications, database searches used the words: “mollusc OR mollusk OR molluscan” AND “traditional OR folk OR Indigenous OR Aboriginal OR historical OR natural” AND “medicine OR ethnomedicine OR remedy” which returned 113 hits minus duplicates (as of July, 2020).

**Table S1:** Traditional medicinal uses of molluscs for respiratory related conditions used in ancient and modern cultures around the world appearing in ethnomedical texts and peer-reviewed articles.

| Class<br>Family<br>Species                                    | Region                                     | Traditional remedy (rem) or local species (sp) name | Part used           | Respiratory ailment/disease used to treat <sup>1</sup>                                                                    | Preparation and application                                                                                                                                                                                                              | Reference |
|---------------------------------------------------------------|--------------------------------------------|-----------------------------------------------------|---------------------|---------------------------------------------------------------------------------------------------------------------------|------------------------------------------------------------------------------------------------------------------------------------------------------------------------------------------------------------------------------------------|-----------|
| <b>Bivalvia</b>                                               |                                            |                                                     |                     |                                                                                                                           |                                                                                                                                                                                                                                          |           |
| Megalobulimidae                                               |                                            |                                                     |                     |                                                                                                                           |                                                                                                                                                                                                                                          |           |
| <i>Megalobulimus oblongus</i>                                 | South America                              | NA                                                  | Whole animal        | Asthma                                                                                                                    | NA                                                                                                                                                                                                                                       | [1]       |
| Mytilidae                                                     |                                            |                                                     |                     |                                                                                                                           |                                                                                                                                                                                                                                          |           |
| <i>Mytilus unguiculatus</i> <sup>2</sup>                      | Korea                                      | Honghap (sp)                                        | Whole animal        | Fever <sup>3</sup>                                                                                                        | Decoction, taken orally                                                                                                                                                                                                                  | [2]       |
| Ostreidae                                                     |                                            |                                                     |                     |                                                                                                                           |                                                                                                                                                                                                                                          |           |
| <i>Crassostrea rhizophorae</i>                                | South America                              | NA                                                  | Flesh and shell     | Pneumonia; flu; tuberculosis; cancer <sup>4</sup>                                                                         | NA                                                                                                                                                                                                                                       | [1]       |
| <i>Ostrea edulis</i>                                          | Europe                                     | Calcarea carbonica (homeopathic rem)                | Shell (inner layer) | Catarrh; laryngismus; asthma; hypersensitivity (asthma and ENT allergies); upper respiratory tract infections in children | One pill or five drops of the remedy every hr for intense symptoms, or 4 hr for milder ones                                                                                                                                              | [3-5]     |
| <b>Pteriidae</b>                                              |                                            |                                                     |                     |                                                                                                                           |                                                                                                                                                                                                                                          |           |
| <i>Pinctada margaritifera</i> (and other <i>Pinctada</i> sp.) | India                                      | Mukta bhasma (rem)                                  | Pearl (ash)         | Cough; asthma; phthisis <sup>5</sup> ; low fevers <sup>6</sup>                                                            | Pearls boiled in juices of <i>Sesbania</i> sp. leaves and flowers then calcined and powdered; transferred to a lemon and stored in paddy before being heated and ashed; ash given twice daily w honey; can be combined w other medicines | [6]       |
| <b>Teredinidae</b>                                            |                                            |                                                     |                     |                                                                                                                           |                                                                                                                                                                                                                                          |           |
| <i>Neoteredo reynei</i>                                       | South America                              | NA                                                  | NA                  | Tuberculosis                                                                                                              | NA                                                                                                                                                                                                                                       | [1]       |
| <i>Lyrodus pedicellatus</i> <sup>7</sup>                      | South America                              | NA                                                  | NA                  | Tuberculosis                                                                                                              | NA                                                                                                                                                                                                                                       | [1]       |
| Veneridae                                                     |                                            |                                                     |                     |                                                                                                                           |                                                                                                                                                                                                                                          |           |
| <i>Anomalocardia brasiliiana</i> <sup>8</sup>                 | South America                              | NA                                                  | Flesh and shell     | Asthma; flu                                                                                                               | NA                                                                                                                                                                                                                                       | [1]       |
| <b>Cephalopoda</b>                                            |                                            |                                                     |                     |                                                                                                                           |                                                                                                                                                                                                                                          |           |
| Loliginidae                                                   |                                            |                                                     |                     |                                                                                                                           |                                                                                                                                                                                                                                          |           |
| <i>Loligo</i> sp.                                             | South America (north/north-eastern Brazil) | Lula (sp)                                           | Shell               | Asthma                                                                                                                    | NA                                                                                                                                                                                                                                       | [7]       |
| Loliginidae, <u>Octopodidae</u>                               |                                            |                                                     |                     |                                                                                                                           |                                                                                                                                                                                                                                          |           |
| <i>Loligo</i> sp. and <i>Octopus</i> sp.                      | South America (Brazil)                     | NA                                                  | Shell and flesh     | Asthma                                                                                                                    | Tea of toasted cuttlefish bones or octopi arms                                                                                                                                                                                           | [8]       |
| <u>Octopodidae</u>                                            |                                            |                                                     |                     |                                                                                                                           |                                                                                                                                                                                                                                          |           |
| <i>Octopus vulgaris</i>                                       | Ancient Greece                             | Polypus (sp)                                        | Flesh               | Heavy nasal congestion w fever; infectious diseases; low immunity <sup>9</sup>                                            | Flesh boiled or roasted                                                                                                                                                                                                                  | [9]       |
| Sepiidae                                                      |                                            |                                                     |                     |                                                                                                                           |                                                                                                                                                                                                                                          |           |
| <i>Sepia officinalis</i>                                      | Europe                                     | Sepia (homeopathic rem)                             | Ink                 | ENT and pulmonary allergies in children and adults                                                                        | NA; usually in combination w other drugs                                                                                                                                                                                                 | [5]       |
| <i>S. officinalis</i>                                         | India                                      | NA                                                  | Shell               | Ear pain; inflammation; otorrhoea                                                                                         | Powdered, used as a dusting powder; fine scraping of bone added to sweet oil or sesame oil and instilled into ears                                                                                                                       | [6]       |
| <i>S. officinalis</i>                                         | Ancient Greece (~800 BC)                   | Sepia (sp)                                          | Flesh               | Low immunity                                                                                                              | Flesh boiled                                                                                                                                                                                                                             | [9]       |
| <b>Gastropoda</b>                                             |                                            |                                                     |                     |                                                                                                                           |                                                                                                                                                                                                                                          |           |
| Achatinidae                                                   |                                            |                                                     |                     |                                                                                                                           |                                                                                                                                                                                                                                          |           |

Abbreviations: NA: data not available; w: with; ENT: ear, nose and throat.

<sup>1</sup> Some traditional remedies have numerous applications and may be used to treat ailments/diseases other than those relating to the respiratory system; please refer to references for additional uses

<sup>2</sup> Listed as *Mytilus coruscus* (Gould 1861)

<sup>3</sup> Not specific to respiratory disease, although a common symptom of respiratory infection

<sup>4</sup> Not specific to respiratory cancer

<sup>5</sup> Also known as pulmonary tuberculosis

<sup>6</sup> Not specific to respiratory disease, although a common symptom of respiratory infection

<sup>7</sup> Listed as *Teredo pedicellata* (Quatrefages 1849)

<sup>8</sup> Listed as *Anomalocardia brasiliiana* (Gmelin 1791)

<sup>9</sup> Generally written as “strengthens body’s immune system”; not specific to respiratory disease, however may assist with prevention and reduced duration of infection; included for the purpose of this review to capture the range of applications for traditional molluscan medicines

|                                                                                                           |                                                  |                                                                        |                     |                                                                                                                                                                                                                                                                                                                          |                                                                                                                                                                                                                                  |                             |
|-----------------------------------------------------------------------------------------------------------|--------------------------------------------------|------------------------------------------------------------------------|---------------------|--------------------------------------------------------------------------------------------------------------------------------------------------------------------------------------------------------------------------------------------------------------------------------------------------------------------------|----------------------------------------------------------------------------------------------------------------------------------------------------------------------------------------------------------------------------------|-----------------------------|
| <i>Limicolaria aurora</i>                                                                                 | Nigeria                                          | Okoso (sp)                                                             | Mucus               | Cough                                                                                                                                                                                                                                                                                                                    | Heat slightly; fluid taken orally from the shell 2-3 times daily                                                                                                                                                                 | [10]                        |
| <b>Ampullariidae</b>                                                                                      |                                                  |                                                                        |                     |                                                                                                                                                                                                                                                                                                                          |                                                                                                                                                                                                                                  |                             |
| <i>Lanistes ovum</i>                                                                                      | Nigeria                                          | Okpaamu (sp)                                                           | Mucus               | Cough                                                                                                                                                                                                                                                                                                                    | Puncture the flesh to obtain fluid; take 1 tablespoonful twice daily                                                                                                                                                             | [10]                        |
| <i>Pomacea lineata</i>                                                                                    | South America                                    | Arua (sp)                                                              | Ova (eggs)          | Asthma                                                                                                                                                                                                                                                                                                                   | NA                                                                                                                                                                                                                               | [10]                        |
| <i>Plia globosa</i>                                                                                       | Nagaland (northern India)                        | Different sp. names among tribes <sup>10</sup>                         | Flesh               | Asthma; tuberculosis                                                                                                                                                                                                                                                                                                     | Flesh cooked and eaten                                                                                                                                                                                                           | [11]                        |
| <b>Aplysiidae</b>                                                                                         |                                                  |                                                                        |                     |                                                                                                                                                                                                                                                                                                                          |                                                                                                                                                                                                                                  |                             |
| <i>Aplysia depilans</i>                                                                                   | Middle East (Middle ages)                        | NA                                                                     | NA                  | Dyspnoea; dry cough; haemoptysis                                                                                                                                                                                                                                                                                         | NA                                                                                                                                                                                                                               | [12]                        |
| <b>Cassidae</b>                                                                                           |                                                  |                                                                        |                     |                                                                                                                                                                                                                                                                                                                          |                                                                                                                                                                                                                                  |                             |
| <i>Cassis tuberosa</i>                                                                                    | South America                                    | NA                                                                     | NA                  | Asthma                                                                                                                                                                                                                                                                                                                   | NA                                                                                                                                                                                                                               | [1]                         |
| <b>Cypraeidae</b>                                                                                         |                                                  |                                                                        |                     |                                                                                                                                                                                                                                                                                                                          |                                                                                                                                                                                                                                  |                             |
| <i>Monetaria moneta</i> <sup>11</sup>                                                                     | India                                            | Cowrie hasma (rem),<br>Kapardika (sp.)                                 | Shell               | Asthma; cough; ear ache; used as expectorant in chronic bronchitis                                                                                                                                                                                                                                                       | Calx (powder) prepared from shell taken orally; instillation of ash with lemon juice for ear ache                                                                                                                                | [6]                         |
| <b>Charoniidae</b>                                                                                        |                                                  |                                                                        |                     |                                                                                                                                                                                                                                                                                                                          |                                                                                                                                                                                                                                  |                             |
| <i>Charonia tritonis</i>                                                                                  | Ancient Greece                                   | Keryx (sp)                                                             | Flesh and shell     | Ear pain; low immunity; parotid gland swelling                                                                                                                                                                                                                                                                           | Flesh applied directly for ear pain; flesh taken internally to strengthen immune system; ashes of burned shell for gland swelling <sup>12</sup>                                                                                  | [9]                         |
| <b>Limacidae</b>                                                                                          |                                                  |                                                                        |                     |                                                                                                                                                                                                                                                                                                                          |                                                                                                                                                                                                                                  |                             |
| <i>Limax</i> sp.                                                                                          | China (since 1596)                               | NA                                                                     | Body                | Wheeze, pharyngitis, asthma                                                                                                                                                                                                                                                                                              | NA                                                                                                                                                                                                                               | [13]                        |
| <b>Helicidae</b>                                                                                          |                                                  |                                                                        |                     |                                                                                                                                                                                                                                                                                                                          |                                                                                                                                                                                                                                  |                             |
| <i>Helix pomatia</i> (and other large terrestrial snail sp.)                                              | Europe (particularly France) 1800's – modern day | Snail syrup (rem) later Helicine (or pertussidine or pomaticine) (rem) | Mucus (or whole)    | Cough and cold; whooping cough; chronic bronchitis; tonsillitis; pharyngitis; hoarseness; sore throat; influenza; croup; nervous cough in children; pneumonia and pulmonary phthisis; anthrax; acute and chronic chest ailments; weakness; cough associated w measles, fever and other inflammatory conditions; scrofula | Helicine- transparent yellow oil extract taken orally; snail formulations also include snail sugar, tablets, syrup, paste, chocolate and ointment; snail water for TB (between one and six ounces); snail paste with donkey milk | [14] and references therein |
| <b>Littorinidae</b>                                                                                       |                                                  |                                                                        |                     |                                                                                                                                                                                                                                                                                                                          |                                                                                                                                                                                                                                  |                             |
| <i>Littorina littorea</i>                                                                                 | Nigeria                                          | Esiemu (sp)                                                            | Mucus               | Inner ear <sup>13</sup> /sinus inflammation                                                                                                                                                                                                                                                                              | Crack the shell at the tail of the live animal to obtain fluid; instill 1-3 drops in ear twice daily                                                                                                                             | [10]                        |
| <i>Littoraria angulifera</i> <sup>14</sup>                                                                | South America                                    | Mela-pau (sp)                                                          | Flesh               | Chesty cough; shortness of breath                                                                                                                                                                                                                                                                                        | NA                                                                                                                                                                                                                               | [1]                         |
| <b>Lymnaeidae</b>                                                                                         |                                                  |                                                                        |                     |                                                                                                                                                                                                                                                                                                                          |                                                                                                                                                                                                                                  |                             |
| <i>Lymnaea</i> sp.                                                                                        | North-eastern India                              | Chengkawl (sp)                                                         | Flesh               | Measles                                                                                                                                                                                                                                                                                                                  | Boiled in water, then flesh is removed and eaten                                                                                                                                                                                 | [15]                        |
| <b>Muricidae</b>                                                                                          |                                                  |                                                                        |                     |                                                                                                                                                                                                                                                                                                                          |                                                                                                                                                                                                                                  |                             |
| Unidentified sp.                                                                                          | Ancient southern India                           | Nakhi (rem)                                                            | Opercula            | Remove phlegm; destroy poison                                                                                                                                                                                                                                                                                            | Used in incense and medicinal oil, heated in clarified butter or cooked w honey                                                                                                                                                  | [16] [17]                   |
| <i>Chicoreus virgineus</i>                                                                                | Medieval Eastern Mediterranean Genizah (Cairo)   | Blatta (rem)                                                           | Opercula            | Tumors; eye and ear diseases                                                                                                                                                                                                                                                                                             | NA                                                                                                                                                                                                                               | [16] [18]                   |
| <i>Hexaplex trunculus</i> ,<br><i>Bolinus brandaris</i> and<br><i>Stramonita haemastoma</i> <sup>15</sup> | Ancient Greece                                   | Banded dye murex,<br>spiny dye murex,<br>rock-shell (sp)               | Shell and operculum | Parotid gland swelling and hearing loss; inflammatory conditions                                                                                                                                                                                                                                                         | Operculum pulverised and mixed w oil and vinegar                                                                                                                                                                                 | [9]                         |
| <b>Onchidiidae</b>                                                                                        |                                                  |                                                                        |                     |                                                                                                                                                                                                                                                                                                                          |                                                                                                                                                                                                                                  |                             |
| <i>Onchidium reevesii</i>                                                                                 | China                                            | NA                                                                     | Body                | Asthma                                                                                                                                                                                                                                                                                                                   | NA                                                                                                                                                                                                                               | [19]                        |
| <b>Turbinellidae</b>                                                                                      |                                                  |                                                                        |                     |                                                                                                                                                                                                                                                                                                                          |                                                                                                                                                                                                                                  |                             |

<sup>10</sup> Jemna, Noula, Achokibo, Mongkoum, Kyakyiro, Shunyaknaloong, Nuyushu, Chakuthe, Yebo, Khapjo

<sup>11</sup> Listed as *Cypraea moneta* (Linnaeus 1758)

<sup>12</sup> Unclear whether applied directly or taken internally

<sup>13</sup> Listed a treatment for inner ear inflammation, though more likely a treatment for middle ear inflammation/infection relating to topical application to tympanic membrane

<sup>14</sup> Listed as *Littorina angulifera* (Lamarck 1822)

<sup>15</sup> Listed as *Thais haemastoma* (Linnaeus 1767)

|                                                         |                                            |                                  |                    |                                                                                                                       |                                                                                 |      |
|---------------------------------------------------------|--------------------------------------------|----------------------------------|--------------------|-----------------------------------------------------------------------------------------------------------------------|---------------------------------------------------------------------------------|------|
| <i>Turbinella rapa</i> or <i>T. pyrum</i> <sup>16</sup> | India                                      | Sankha (sp), Sankha bhasma (rem) | Shell (ash), flesh | Asthma; tuberculosis and tumours (flesh); excessive mucus, sore throat, earache, high fevers and cough (shell powder) | Shells incinerated to powder (calcined); prepared into pills, salves and pastes | [6]  |
| Veronicellidae<br>Unidentified sp.                      | South America (north/north-eastern Brazil) | Lesma (sp)                       | Whole animal       | Sore throat                                                                                                           | NA                                                                              | [20] |
| <u>Viviparidae</u><br><i>Filopaludina</i> sp.           | North Bihar, India                         | NA                               | Foot               | Asthma                                                                                                                | Soup prepared from foot and taken orally                                        | [21] |

---

<sup>16</sup> Listed as *Xancus pyrum* (Linnaeus 1767)

**Table S2:** Traditional Chinese medicines (TCMs) derived from molluscs relevant to the treatment of respiratory disease listed in the Chinese *Marine Materia Medica* [22] presented directly as translated by L. Liu.

| Class<br>Family<br>Species <sup>1</sup>                                                                                                                                                                          | Traditional remedy name | Part used       | Respiratory ailment/disease used to treat                                                              | Preparation and application                                                                                                                         |
|------------------------------------------------------------------------------------------------------------------------------------------------------------------------------------------------------------------|-------------------------|-----------------|--------------------------------------------------------------------------------------------------------|-----------------------------------------------------------------------------------------------------------------------------------------------------|
| <b>Bivalvia</b>                                                                                                                                                                                                  |                         |                 |                                                                                                        |                                                                                                                                                     |
| Anomiidae, Placunidae<br><i>Placuna placenta</i> , <i>P. ephippium</i> , <i>Enigmnomia aenigmatica</i> , <i>Anomia chinensis</i>                                                                                 | Hai Yue                 | Flesh and shell | Measles; retention of sputum <sup>2</sup>                                                              | Boil flesh and eat (30-60 g each time); grind powder for infusion and ingest                                                                        |
| Arcidae<br><i>Anadara inaequalis</i>                                                                                                                                                                             | Bi Na Han               | Shell           | Tuberculosis of lymph nodes <sup>3</sup> ; cough                                                       | Decoct the crushed shell and ingest (15-50 g each time)                                                                                             |
| Arcidae, Noetiidae, Limidae<br>17 sp.                                                                                                                                                                            | Wa Leng Zi              | Shell           | Phlegm in hypochondrium; chronic cough; scrofula                                                       | Decoct and ingest (9-15 g each time); grind into powder for infusion (1.5-3 g); ustulate (scorch) the shell, grind into powder and apply externally |
| Donacidae<br><i>Donax faba</i>                                                                                                                                                                                   | Dou Fu Ge Ke            | Shell           | Tuberculosis of lymph nodes; cough and phlegm                                                          | Decoct and ingest (15-50 g each time)                                                                                                               |
| <i>D. faba</i>                                                                                                                                                                                                   | Fu Ge Ke                | Shell           | Tuberculosis of lymph nodes                                                                            | Ustulate the shell, decoct and ingest.                                                                                                              |
| Glauconomidae<br><i>Glauconome chinensis</i>                                                                                                                                                                     | Lu Lang Ke              | Shell           | Tuberculosis of lymph nodes                                                                            | Decoct and ingest (15-50 g each time)                                                                                                               |
| Lucinidae, Carditidae, Semelidae, Glossidae<br>9 sp.                                                                                                                                                             | Man Yue Ge Ke           | Shell           | Tuberculosis of lymph nodes; cough and phlegm                                                          | Grind into powder and ingest, or decoct and ingest (15-50 g)                                                                                        |
| Mactridae, Astartidae<br><i>Macra quadrangularis</i> (or <i>Astarte borealis</i> ) <sup>4</sup> , <i>Lutraria rhynchaena</i> <sup>5</sup> , <i>M. grandis</i> <sup>6</sup> , <i>M. inaequalis</i>                | Ge Li/Ge Li Fen         | Flesh and shell | Retention of phlegm; asthmatic cough; scrofula; edema <sup>7</sup>                                     | Decoct crushed shell and ingest (50–100 g each time), grind into powder and ingest or apply externally                                              |
| Mactridae, Psammobiidae<br><i>Macra antiquata</i> , <i>Haitula diphos</i>                                                                                                                                        | Xi Shi She              | Shell           | Tuberculosis of lymph nodes; conjunctive congestion with swelling and pain <sup>8</sup> ; pharyngalgia | Ustulate the shell, decoct and ingest.                                                                                                              |
| Myidae<br><i>Mya arenaria</i>                                                                                                                                                                                    | Sha Hai Lang            | Shell           | Tuberculosis of lymph nodes                                                                            | Decoct and ingest (15-30 g each time)                                                                                                               |
| Ostreidae, Grypaeidae<br>12 sp.                                                                                                                                                                                  | Mu Li                   | Flesh and shell | Tuberculosis of lymph nodes; cancer and neoadjuvant treatment <sup>9</sup> ; scrofula                  | Smash flesh and apply externally                                                                                                                    |
| Pharidae<br><i>Simonovacula constricta</i>                                                                                                                                                                       | Cheng Ke                | Shell           | Sore throat                                                                                            | Ingest calcined and pulverised powder (3-6 g) with water                                                                                            |
| Psammobiidae<br><i>Gari maculosa</i> , <i>Gari radiata</i> , <i>G. elongata</i> <sup>10</sup> , <i>Asaphis violascens</i> , <i>Nuttallia obscurata</i> <sup>11</sup> , <i>S. virescens</i> , <i>S. chinensis</i> | Zi Yun Ge               | Shell           | Tuberculosis of lymph nodes; cough and phlegm                                                          | Decoct and ingest (15-50 g each time)                                                                                                               |
| Pteriidae<br><i>Isognomon isognomum</i> , <i>I. perna</i> , <i>I. nucleus</i> , <i>I. legumen</i>                                                                                                                | Qian Ge                 | Adductor muscle | High fever and convulsion (children) <sup>12</sup> ; tuberculosis of lymph nodes; cough and phlegm     | Decoct and ingest (15-25 g each time) or grind into powder and ingest                                                                               |

<sup>1</sup> For the purpose of this table, the complete list of species is provided where the remedy comprises ≤8 sp. For those remedies comprising >8 sp, a comprehensive list of species is available upon request of the authors

<sup>2</sup> Retention of sputum, retention of phlegm and retention of fluid in chest also known as pulmonary congestion

<sup>3</sup> The bacteria that cause pulmonary tuberculosis can cause symptoms outside the lungs; “tuberculosis of lymph nodes” is one of the most common extrapulmonary manifestations of tuberculosis, whereas “scrofula” (or cervical lymphadenopathy) refers specifically to tuberculosis of the lymph nodes in the neck (Jha et al 2001). Although these definitions may be interchangeable, the information presented remains directly as translated (Liu, pers. com).

<sup>4</sup> Listed as *M. veneriformis* (Reeve 1854/Wood 1828)

<sup>5</sup> Listed as *L. australis* (Reeve 1854)

<sup>6</sup> Listed as *M. mera* (Reeve 1854)

<sup>7</sup> Not specific to respiratory system though included as lung edema may accompany other ailments listed

<sup>8</sup> Typically a secondary manifestation of respiratory infection

<sup>9</sup> Not specific to cancer of the respiratory system

<sup>10</sup> Listed as *Sanguinolaria elongata*, (Lamarck 1818)

<sup>11</sup> Listed as *S. olivacea* (Jay 1857)

<sup>12</sup> Not specific to respiratory disease, however may accompany respiratory infection

|                                                                                                                                                                                                                       |                        |                                                      |                                                                                                                                                                                                           |                                                                                                                             |
|-----------------------------------------------------------------------------------------------------------------------------------------------------------------------------------------------------------------------|------------------------|------------------------------------------------------|-----------------------------------------------------------------------------------------------------------------------------------------------------------------------------------------------------------|-----------------------------------------------------------------------------------------------------------------------------|
| <i>Pinctada imbricata</i> <sup>13</sup> , <i>P. margaritifera</i> , <i>P. maxima</i> , <i>P. chemnitzii</i> ,<br><i>Electroma alacovi</i> <sup>14</sup> , <i>Pteria heteroptera</i> <sup>15</sup> , <i>P. penguin</i> | Zhen Zhu/Zhen Zhu Mu   | Pearl/shell<br>hypostracum<br>and prismatic<br>layer | Pharyngitis; retention of fluid in chest; cough and<br>regurgitation; conjunctive congestion; bleeding from five<br>aperture or subcutaneous tissue (e.g. eye, ear, nose, teeth,<br>tongue) <sup>16</sup> | Grind pearl into powder and ingest (0.3-1 g each time) or apply externally;<br>grind shell into powder and apply externally |
| Solenidae, Pharidae, Solecurtidae<br>13 sp.                                                                                                                                                                           | Ma Dao                 | Shell                                                | Sore throat; retention of phlegm and fluid                                                                                                                                                                | Decoct and ingest (5-15 g)                                                                                                  |
| Tellinidae<br>15 sp.                                                                                                                                                                                                  | Ying Ge Ke             | Shell                                                | Tuberculosis of lymph nodes; cough and phlegm                                                                                                                                                             | Ustulate the shell, grind into powder and ingest                                                                            |
| Veneridae<br>10 sp.                                                                                                                                                                                                   | Hai Ge Ke              | Shell                                                | Asthma; scrofula                                                                                                                                                                                          | Decoct and ingest (10-25 g each time); grind into powder and apply externally                                               |
| <i>Ruditapes philippinarum</i> , <i>R. variegatus</i> <sup>17</sup> (or <i>Venerupis aspera</i> )                                                                                                                     | Ge Zai                 | Flesh and<br>shell                                   | Asthmatic cough                                                                                                                                                                                           | Boil and eat flesh, decoct and ingest; or ustulate (scorch) the shell, grind into<br>powder and apply externally            |
| <i>Mercenaria mercenaria</i>                                                                                                                                                                                          | Ying Ke Ge             | Shell                                                | Dyspnoea with cough; scrofula                                                                                                                                                                             | Decoct and ingest (10-15 g each time)                                                                                       |
| <i>Paphia amabilis</i>                                                                                                                                                                                                | He Ai Ba Fei Ge        | Shell                                                | Phlegmatic heat and cough; tuberculosis of lymph nodes;<br>pain in sternum <sup>18</sup>                                                                                                                  | Decoct and ingest (10-15 g each time)                                                                                       |
| <i>Macra chinensis</i>                                                                                                                                                                                                | Ke                     | Shell                                                | Cough and phlegm                                                                                                                                                                                          | Decoct the crushed shell and ingest (20-50 g each time), grind into powder and<br>apply externally                          |
| 13 sp.                                                                                                                                                                                                                | Wen Ge Rou             | Flesh                                                | Cough with dyspnoea and chest stuffiness; scrofula                                                                                                                                                        | Boil and eat flesh (30-60 g)                                                                                                |
| <i>Paphia lirata</i>                                                                                                                                                                                                  | Wen Ban Ba Fei Ge      | Shell                                                | Cough and phlegm; chronic tracheitis                                                                                                                                                                      | Decoct and ingest (10-15 g)                                                                                                 |
| 10 sp.                                                                                                                                                                                                                | Ge Ke                  | Shell                                                | Phlegmatic heat and cough; scrofula; pain in sternum                                                                                                                                                      | Decoct the crushed shell and ingest (10-15 g each time) or grind into powder<br>and apply externally                        |
| <i>Meretrix lamarckii</i>                                                                                                                                                                                             | Fu Wen Ge/Fu Wen Ge Ke | Shell and<br>flesh                                   | Scrofula; cough                                                                                                                                                                                           | Decoct and ingest (6-15 g each time) or grind into powder and apply<br>externally                                           |
| <i>Protapes gallus</i>                                                                                                                                                                                                | Ju Chi Ba Fei Ge       | Shell                                                | Scrofula                                                                                                                                                                                                  | Decoct and ingest (10-15 g each time)                                                                                       |
| <b>Cephalopoda</b><br>Sepiidae<br>9 sp.                                                                                                                                                                               | Hai Piao Xiao          | Cuttlebone                                           | Bleeding from five aperture or subcutaneous tissue (e.g.<br>eye, ear, nose, teeth, tongue)                                                                                                                | Decoct and ingest (10-30 g)                                                                                                 |
| <b>Gastropoda</b><br>Aplysiidae<br><i>Bursatella leachii</i> , <i>Aplysia argus</i> , <i>A. kurodai</i> , <i>A. dactyломela</i> ,<br><i>Dolabella auricularia</i>                                                     | Hai Fen                | Egg masses                                           | Xeropulmonary cough <sup>19</sup> ; dyspnoea with cough;<br>tuberculosis; scrofula; tuberculosis of lymph nodes;<br>epistaxis <sup>20</sup>                                                               | Decoct and ingest (30-60 g each time)                                                                                       |
| Buccinidae, Nassariidae<br><i>Neptunea cumingii</i> , <i>Phos senticosus</i>                                                                                                                                          | Xiang Luo              | Shell                                                | Tuberculosis of lymph nodes                                                                                                                                                                               | Decoct and ingest (15-25 g each time) or apply externally                                                                   |
| Conidae<br>23 sp.                                                                                                                                                                                                     | Yu Luo Ke              | Shell                                                | Tuberculosis of lymph nodes                                                                                                                                                                               | Decoct and ingest (15-25 g each time) or ustulate the shell, grind into powder<br>and ingest (3-6 g)                        |
| Cypraeidae<br>11 sp.                                                                                                                                                                                                  | Bai Bei                | Shell                                                | Acute and chronic sinusitis                                                                                                                                                                               | Decoct and ingest (5-15 g each time)                                                                                        |
| 10 sp.                                                                                                                                                                                                                | Zi Bei                 | Shell                                                | Children with fever; conjunctive congestion with swelling<br>and pain; acute and chronic sinusitis; measles; heat<br>toxicity; headache <sup>21</sup>                                                     | Decoct and ingest (15-25 g each time)                                                                                       |
| <i>Lyncina carneola</i>                                                                                                                                                                                               | Rou Se Bao Bei         | Shell                                                | Acute and chronic sinusitis; high fever                                                                                                                                                                   | Grind into powder, decoct and ingest (5-15 g each time)                                                                     |

<sup>13</sup> Listed as *Pinctada fucata martensii* (Dunker 1880)

<sup>14</sup> Listed as *Electroma ovata* (Quoy & Gaimard 1835)

<sup>15</sup> Listed as *Pteria breviaalata* (Dunker 1872)

<sup>16</sup> Unclear whether specific to respiratory disease; may be caused by secondary infection

<sup>17</sup> Listed as *R. variegata* [sic]

<sup>18</sup> Not specific to respiratory disease, however may be symptomatic of inflammation or persistent cough

<sup>19</sup> Also known as dry cough

<sup>20</sup> Arises from burst blood vessels in nose; may be due to allergies, sinus and nasal infections, coughing and sneezing, as well as non-respiratory ailments or trauma

<sup>21</sup> Heat toxicity (?) and headache may accompany other listed respiratory ailments

|                                                                                                                                                                   |                       |             |                                                                                                                                         |                                                                                                                                                                                                 |
|-------------------------------------------------------------------------------------------------------------------------------------------------------------------|-----------------------|-------------|-----------------------------------------------------------------------------------------------------------------------------------------|-------------------------------------------------------------------------------------------------------------------------------------------------------------------------------------------------|
| <i>Naria erosa</i> <sup>22</sup>                                                                                                                                  | Yan Qiu Bei           | Shell       | Phlegm; tuberculosis of lymph nodes; conjunctive congestion with swelling and pain; fullness sensation in chest and shortness of breath | Grind into powder, decoct and ingest (5-15 g each time)                                                                                                                                         |
| <b>Fasciolariidae</b>                                                                                                                                             |                       |             |                                                                                                                                         |                                                                                                                                                                                                 |
| <i>Filifusus filamentosus</i> <sup>23</sup> , <i>Pleuroploca trapezium</i>                                                                                        | Xi Lei Luo Ke         | Shell       | Phlegm; cough                                                                                                                           | Decoct and ingest (15-30 g each time)                                                                                                                                                           |
| <b>Ficidae</b>                                                                                                                                                    |                       |             |                                                                                                                                         |                                                                                                                                                                                                 |
| <i>Ficus gracilis</i> , <i>F. subintermedia</i> <sup>24</sup> , <i>F. ficus</i>                                                                                   | Pi Ba Luo Ke          | Shell       | Children with fever; night sweating; chronic tracheitis; feverish sensation in chest                                                    | Grind into powder, decoct and ingest (15-25 g each time)                                                                                                                                        |
| <b>Haliotidae</b>                                                                                                                                                 |                       |             |                                                                                                                                         |                                                                                                                                                                                                 |
| 9 sp.                                                                                                                                                             | Bao Yu                | Flesh       | Cough                                                                                                                                   | Boil and eat the flesh or decoct and ingest (fresh 6-9 g each time or sun-dried 15-50 g each time)                                                                                              |
| <b>Haminoeidae</b>                                                                                                                                                |                       |             |                                                                                                                                         |                                                                                                                                                                                                 |
| <i>Bullacta caurina</i> <sup>25</sup>                                                                                                                             | Tu Tie                | Flesh       | Pharyngitis; tuberculosis; cough                                                                                                        | Boil flesh and eat moderate amount (about 30 – 200 g each time)                                                                                                                                 |
| <b>Harpidae, Cassidae</b>                                                                                                                                         |                       |             |                                                                                                                                         |                                                                                                                                                                                                 |
| <i>Morum cancellatum</i> , <i>Phalium areola</i> , <i>Cassis cornuta</i> , <i>Semicassis bisulcata</i> , <i>P. flammiferum</i> , <i>P. glaucum</i>                | Guan Luo Ke           | Shell       | Tuberculosis of lymph nodes                                                                                                             | Grind into powder, decoct and ingest (15-50 g each time)                                                                                                                                        |
| <b>Melongenidae</b>                                                                                                                                               |                       |             |                                                                                                                                         |                                                                                                                                                                                                 |
| <i>Hemifusus tuba</i> , <i>Brunneifusus ternatanus</i> <sup>26</sup>                                                                                              | Jiao Luo/Jiao Luo Yan | Flesh/shell | Otitis media                                                                                                                            | Grind into powder, decoct and ingest (5-15 g each time); apply flesh externally                                                                                                                 |
| <b>Muricidae</b>                                                                                                                                                  |                       |             |                                                                                                                                         |                                                                                                                                                                                                 |
| <i>Rapana bezoar</i> , <i>R. rapiformis</i> , <i>R. venosa</i>                                                                                                    | Hai Luo/Hai Luo Ke    | Flesh/shell | Chest and abdomen heat and pain; scrofula                                                                                               | Boil flesh and eat moderate amount (30-60 g); decoct the shell and ingest (15-30 g); used as medicinal powder- ustulate the shell, grind into powder, mix with sesame oil and apply externally. |
| <b>Indothais gradata, Reishia luteostoma</b>                                                                                                                      |                       |             |                                                                                                                                         |                                                                                                                                                                                                 |
| <i>Murex aduncospinosus</i> , <i>M. pecten</i> <sup>28</sup> , <i>Vokesimurex rectirostris</i> , <i>M. ternispina</i> , <i>M. trapa</i> , <i>Nassa francolina</i> | La Luo                | Shell       | Clear heat <sup>27</sup> ; scrofula; phlegm and cough                                                                                   | Decoct the crushed shell and ingest (15-25 g)                                                                                                                                                   |
| 12 sp.                                                                                                                                                            | Gu Luo                | Shell       | Clear heat; otitis media                                                                                                                | Decoct the shell and ingest; ustulate the shell, grind into powder and apply externally.                                                                                                        |
| <b>Chicoreus ramosus</b>                                                                                                                                          |                       |             |                                                                                                                                         |                                                                                                                                                                                                 |
|                                                                                                                                                                   | Ji Luo                | Shell       | Clear heat; scrofula                                                                                                                    | Decoct the shell (15-50 g) and ingest; ustulate the shell, grind into powder and apply externally; used for making pills or medicinal powder                                                    |
| <b>Chicoreus brunneus</b>                                                                                                                                         |                       |             |                                                                                                                                         |                                                                                                                                                                                                 |
| <i>Rapana rapiformis</i>                                                                                                                                          | He Ji Luo             | Shell       | Scrofula                                                                                                                                | Decoct the shell and ingest                                                                                                                                                                     |
| <b>Nacellidae</b>                                                                                                                                                 |                       |             |                                                                                                                                         |                                                                                                                                                                                                 |
| <i>Cellana toreuma</i> , <i>C. testudinaria</i>                                                                                                                   | Jia Qi                | Shell       | Conjunctive congestion with swelling and pain; scrofula; phlegm                                                                         | Decoct and ingest (10-15 g each time)                                                                                                                                                           |
| <b>Naticidae</b>                                                                                                                                                  |                       |             |                                                                                                                                         |                                                                                                                                                                                                 |
| 14 sp.                                                                                                                                                            | Yu Luo Ke             | Shell       | Tuberculosis of lymph nodes                                                                                                             | Decoct and ingest (15-50 g each time)                                                                                                                                                           |
| <b>Ranellidae, Personidae</b>                                                                                                                                     |                       |             |                                                                                                                                         |                                                                                                                                                                                                 |
| 10 sp.                                                                                                                                                            | Qian Xian Luo Ke      | Shell       | Tuberculosis of lymph nodes                                                                                                             | Grind into powder, decoct and ingest (15-50 g each time)                                                                                                                                        |
| <b>Strombidae</b>                                                                                                                                                 |                       |             |                                                                                                                                         |                                                                                                                                                                                                 |
| 10 sp.                                                                                                                                                            | Feng Luo Ke           | Shell       | Tuberculosis of lymph nodes                                                                                                             | Decoct and ingest (15-25 g each time)                                                                                                                                                           |
| <b>Tonnidae</b>                                                                                                                                                   |                       |             |                                                                                                                                         |                                                                                                                                                                                                 |
| <i>Malea pomum</i> , <i>Tonna chinensis</i> <sup>29</sup> , <i>T. galea</i> , <i>T. perdix</i> , <i>T. sulcosa</i>                                                | Chun Luo Ke           | Shell       | Tuberculosis of lymph nodes; hypertension                                                                                               | Grind into powder or ustulate the shell, decoct and ingest (15-30 g each time)                                                                                                                  |
| <b>Turritellidae</b>                                                                                                                                              |                       |             |                                                                                                                                         |                                                                                                                                                                                                 |
| <i>Neohastator fortilirata</i> <sup>30</sup> , <i>Turritella terebra</i> , <i>T. bacillum</i>                                                                     | Zhui Luo Yan          | Operculum   | Conjunctive congestion with swelling and pain                                                                                           | Decoct and ingest (15-30 g each time)                                                                                                                                                           |

#### **Polyplacophora**

<sup>22</sup> Listed as *Erosaria erosa* (Linnaeus 1758)

<sup>23</sup> Listed as *Pleuroploca filamentosa* (Roding 1798)

<sup>24</sup> Listed as *F. ficus (subintermedius)*

<sup>25</sup> Listed as *Bullacta exarata* (Philippi 1849)

<sup>26</sup> Listed as *H. ternatanus* (Gmeline 1791)

<sup>27</sup> Unclear whether “clear heat” refers to fever or otherwise; medicine use to “clear heat” only included in this review if also used for respiratory diseases/symptoms

<sup>28</sup> Listed as *M. pecten pecten* (Lightfoot 1786)

<sup>29</sup> Also listed as *T. chinensis (magnifica)* (G. B. Sowerby III 1904)

<sup>30</sup> Listed as *Turritella fortilirata* (G. B. Sowerby III 1914)

---

|                                                                                   |             |       |                                            |                                                                                                                      |
|-----------------------------------------------------------------------------------|-------------|-------|--------------------------------------------|----------------------------------------------------------------------------------------------------------------------|
| Acanthochitonidae                                                                 |             |       |                                            |                                                                                                                      |
| <i>Acanthochiton rubrolineata</i>                                                 | Hai Shi Bie | Whole | Asthma; pulmonary tuberculosis; bronchitis | Grind into powder and prepared as infusion, or made into capsule or tablet for oral administration (2-6 g each time) |
| Ischnochitonidae                                                                  |             |       |                                            |                                                                                                                      |
| <i>Ischnochiton hakodadensis, Lepidozona coreanica, I. boninensis, I. comptus</i> | Cuo Shi Bie | Whole | Asthma; pulmonary tuberculosis; bronchitis | Grind into powder and infusion for oral administration (1-3 g each time)                                             |

---



**Table S3: Human clinical trials and *in vivo* animal models using molluscan hemocyanins as vaccine adjuvants/conjugates for respiratory disease.**

| Mollusc class     | Model and study design <sup>1</sup>                                                                                                                                                                                                                                                                                                       | Main findings                                                                                                                                                                                                                                                                                                                                                                                  | Effective concentrations <sup>2</sup>         | Reference         |
|-------------------|-------------------------------------------------------------------------------------------------------------------------------------------------------------------------------------------------------------------------------------------------------------------------------------------------------------------------------------------|------------------------------------------------------------------------------------------------------------------------------------------------------------------------------------------------------------------------------------------------------------------------------------------------------------------------------------------------------------------------------------------------|-----------------------------------------------|-------------------|
| Family            |                                                                                                                                                                                                                                                                                                                                           |                                                                                                                                                                                                                                                                                                                                                                                                |                                               |                   |
| <b>Gastropoda</b> |                                                                                                                                                                                                                                                                                                                                           |                                                                                                                                                                                                                                                                                                                                                                                                |                                               |                   |
| Fissurellidae     | Clinical trial involving 13 small-cell lung cancer (SCLC) patients (10 completed) receiving 5-6 s.c. immunisations w Fuc-GM1 (SCLC ganglioside) 30 µg conjugated to KLH (696:1) w QS-21 adjuvant                                                                                                                                          | Fuc-GM1 immunogenicity enhanced by conjugation to KLH and mixture w QS-21 adjuvant; increased IgM and IgG Ab titers despite prior chemotherapy treatment; well-tolerated and non-toxic; antisera antibodies from 6/10 patients bound to H146 (human lung carcinoma) cells                                                                                                                      | 30 µg antigen-KLH conjugate (696:1)           | [23] <sup>3</sup> |
|                   | Randomised, double-blind, placebo-controlled clinical trial involving 60 patients w cypress pollen allergy (allergic rhinitis); 3x i.m. immunisations w 250 µg peptide-KLH conjugate (1:2) vaccine (or sucrose placebo) at 28-d intervals + booster; challenged w lyophilised <i>Cupressus sempervirens</i> pollen i.n.                   | Nasal challenge threshold dose and skin sensitivity not sig different between vac and placebo; IgE lower but not statistically; IgG sig elevated; anti-KLH antibodies not detectable; overall positive Ab response, however the vaccine was not effective against cypress pollen allergy symptoms                                                                                              | 250 µg antigen-KLH conjugate (1:2)            | [24]              |
|                   | Double blind, randomised, phase III multicentre clinical trial of Sialyl-TN (STn)-KLH vaccine for metastatic breast cancer involving 1028 women, 38% w metastatic lung cancer (~350 patients) immunised i.m. w STn-KLH conjugate (9%) (or 100 µg KLH controls) <sup>4</sup> (monthly-quarterly treatments for up to 50 mo)                | High anti-OSM and anti-STN Ab titers in STn-KLH group, none in KLH control group; anti-KLH Ab responses present in both groups, but at lower median levels in the STn-KLH group- higher response to the hapten (STn) than to the carrier (KLH) (appropriately designed vaccine); higher IgM than IgG; no sig dif in median time to progression or survival time between groups; well tolerated | 100 µg antigen-KLH conjugate (9%)             | [25]              |
|                   | Combination cancer therapy clinical safety/feasibility study involving 26 patients w advanced treatment refractory cancer (including 4 lung); immature dendritic cells (iDC) mixed w lymphocyte conditioned media + 1 mg KLH injected into metastatic lesions (i.t.t.) followed by i.v. activated T-cells and radiation treatment         | Increase in anti-KLH Abs after 36 d (p<0.05); frequency of KLH immunity sig. higher in the complete response group (58.3%) compared to recurrent and progressive disease groups; KLH immunity had better overall survival; no toxicity observed; DCs can acquire co-injected antigens and generate an adaptive immune response                                                                 | 1 mg KLH                                      | [26]              |
|                   | <i>Haemophilus influenzae</i> (NTHi) immunisation model using NZ white rabbits (n=2/group) immunised 3x s.c. w one of 3x synthetic NTHi lipo-oligosaccharide (LOS)-related peptides conjugated to KLH in CFA/IFA (or KLH alone) <sup>5</sup>                                                                                              | All 3 peptide-KLH conjugates elicited high anti-LOS IgM, IgG Ab titers; KLH alone showed lower binding reactivity and Ab titers; other results not specific to KLH treatment                                                                                                                                                                                                                   | 500 µg KLH                                    | [27]              |
|                   | Acute pneumonia immunisation model using mice (n=20/experiment) immunised w one of 10x <i>P. aeruginosa</i> -derived peptides conjugated to KLH; peptide-KLH w alum administered s.c. twice (+2x boosters); KLH or peptide alone controls (same concs)                                                                                    | Higher anti-peptide IgG Ab titers and opsonic/phagocytic activity w conjugates compared to peptides or KLH alone (p<0.05); KLH alone showed higher Ab titers than some conjugate treatments and increased Ab and opsonic/phagocytic response though not sig dif to naïve mouse sera                                                                                                            | 150 µg KLH alone; 150 µg antigen-KLH (25:20)  | [28]              |
|                   | Acute pneumonia immunisation-infection model using mice (n=30-50/group) immunised w 50 µg of one of 4x peptide-KLH (or -BSA) conjugates w CT <sup>6</sup> administered 2x i.n., before <i>P. aeruginosa</i> pneumonia challenge; carrier only controls- KLH followed by BSA                                                               | Higher anti-peptide IgG, IgA Ab titers with conjugation; 47-78% survival depending on protein; survival with conjugates (up to 78%) higher than KLH/BSA alone (46%) (p<0.04)                                                                                                                                                                                                                   | 150 µg KLH alone; 150 µg antigen-KLH (25:20)  | [29]              |
|                   | Influenza immunisation-infection model using C57BL/6 or Balb/c mice (n=5-15/group) immunised i.m. w 5 µg influenza hemagglutinin (HA) stem domain (stemHA), stemHA-KLH or full-length HA w CFA/IFA; challenged i.n. w 50 µL TCID <sub>50</sub> influenza virus (clinical strains)                                                         | stemHA-KLH or full-length HA immunisation resulted in high Ab titers and strong recruitment of stem-specific B cells (p<0.01 compared to stem HA alone); poor immune responses to stem HA- relieved by covalent coupling to KLH; can confer broad protection to different strains                                                                                                              | 5 µg antigen-KLH (ratio NA)                   | [30]              |
|                   | Allergic asthma immunotherapy model using Balb/c mice (n=5/group) sensitised i.p. to recombinant grass pollen antigen (rPh1) then challenged i.n. to aerosol rPh1; 6x s.c. immunisations w Ph1 mimotope coupled to KLH, KLH alone, or rPh1 in PBS and re-challenged w aerosol rPh1                                                        | Ph1 mimotope-KLH and rPh1 decreased inflammatory cell infiltration, mucus secretion, Th2 cytokine expression (p<0.05) compared to mimotope or KLH alone; KLH alone caused higher BALF/spleen eosinophil and goblet cell counts and cytokine (IL-4, IL-5, IFN-γ) levels compared to PBS treatment (p<0.05); anti-Ph1 IgG1, IgE Ab titers not sig dif between treatments                         | antigen-KLH (~1:50); KLH alone (10 µg/100 µL) | [31]              |
|                   | Acute pneumonia/ <i>P. aeruginosa</i> (Pa) infection model using CD-1 mice (n=13-14/group) administered i.n. FpvA (Pa membrane receptor) conjugated to KLH, or FpvA only or whole-cell Pa vaccine) (or FpvA, PBS or KLH alone) w curdlan adjuvant, booster at 21 d, i.n. bacterial challenge at day 34 w <i>P. aeruginosa</i> PAO1 strain | FpvA-KLH higher anti-Pa/anti-FpvA IgG, IgM, IgA Ab titers, >CD11+ dendritic cells and memory CD4+ cells, <bacterial burden and lung edema, >Ab response to both clinical CF Pa isolates and laboratory strains (p=0.0001-0.05 compared to PBS or FpvA only); comparable activity to whole cell vaccine; induced a humoral and IL-17-type cellular immune response                              | 30 µg antigen-KLH (1:1)                       | [32]              |

Abbreviations: Ab: antibody; Hc: hemocyanin; w: with; KLH: keyhole limpet hemocyanin; CFA: Complete Freund's Adjuvant; IFA: Incomplete Freund's Adjuvant; BSA: Bovine serum albumin; BALF: bronchoalveolar lavage fluid.

<sup>1</sup> Administration routes: i.p.- intraperitoneal, i.n.- intranasal, s.c.- subcutaneous, i.v.- intravenous, i.m.- intramuscular, i.t.- intratracheal, i.c.- intracutaneous, i.b.- intrabullar

<sup>2</sup> All hemocyanins derived from hemolymph, and all laboratory grade unless indicated as experimentally purified (\*).

<sup>3</sup> Dickler et al. (1999), and several similar studies (e.g. Babatz, 2006; Krug et al., 2004a, 2004b, 2012), are examples of the use of KLH in conjugate preparations to improve vaccine immunogenicity, however not provide specific information on KLH bioactivity and are therefore not comprehensively reviewed in this table

<sup>4</sup> Initial four immunisations with Enhanzyn™ adjuvant, no adjuvant thereafter

<sup>5</sup> Also included a passive immunisation-infection model using Balb/c mice (n=10/group) immunised with 40 or 80% rabbit antisera before NTHi challenge, though did not used antisera from control rabbit treated with KLH only

<sup>6</sup> Cholera toxin subunit used as stimulatory adjuvant, known to activate mast cells

|                                           |                                                                                                                                                                                                                                                                                                                                                |                                                                                                                                                                                                                                                                                                                                                           |                                                          |      |
|-------------------------------------------|------------------------------------------------------------------------------------------------------------------------------------------------------------------------------------------------------------------------------------------------------------------------------------------------------------------------------------------------|-----------------------------------------------------------------------------------------------------------------------------------------------------------------------------------------------------------------------------------------------------------------------------------------------------------------------------------------------------------|----------------------------------------------------------|------|
|                                           | Tuberculosis immunisation model using Swiss Webster outbred mice (n=5-15/group) immunised w <i>M. tuberculosis</i> cell wall peptide (LAM) mimotopes (e.g. HS, SG, P1 peptides) conjugated to KLH (s.c.) or AcMNPV baculovirus (i.n.) (or KLH or PBS alone) + 3x boosters <sup>7</sup>                                                         | Only mice immunised w HCpeptide-KLH generated Abs that cross-reacted w LAM (p<0.0001); peptide-KLH higher anti-LAM IgG Ab titers as more available cysteine residues for conjugation + immune stimulation                                                                                                                                                 | 10 µg antigen-KLH (1:1)                                  | [33] |
|                                           | Respiratory syncytial virus (RSV) infection-immunisation-pulmonary eosinophilia model using Balb/c mice (n=5/group) immunised i.m. 2x w RSV Gpeptides conjugated to KLH or purified Gprotein (no KLH) (or PBS or KLH alone) w QS-21 adjuvant, challenged w RSV i.n. 2 wk after                                                                 | KLH effective carrier of smaller Gprotein functional peptide; higher BALF eosinophil counts w Gprotein and peptide15-KLH compared to KLH or PBS alone (p<0.05; no difference between KLH and PBS)                                                                                                                                                         | 250 µg antigen-KLH (50-80:1)                             | [34] |
|                                           | <i>Pseudomonas aeruginosa</i> immunisation-infection model using C3H-HeN mice (n=5/group) and NZ white rabbit (n=1) immunised s.c. w <i>P. aeruginosa</i> polysaccharide (MEP) w KLH; mice: MEP, MEP + KLH mixture, or MEP-KLH conjugate (no adjuvant) x3 s.c. vaccinations; rabbit: MEP-KLH w CFA/IFA x2 s.c. vaccinations + 4x i.v. boosters | Mixture induced significant IgM but failed to induce IgG (T-cell-independent response); conjugate elicited both IgM and IgG and higher antisera opsonophagocytic killing (p<0.01) correlating w high lung clearance; both mixture and conjugate better result than MEP alone                                                                              | 1 µg antigen-KLH conjugate; >10 µg antigen + KLH mixture | [35] |
|                                           | <i>Pseudomonas aeruginosa</i> and <i>Burkholderia cepacia</i> immunisation-infection model using Sprague-Dawley rats (n=9/group) immunised i.m. w pep15-KLH, pep42-KLH, or KLH in CFA + 2x boosters; bacterial challenge                                                                                                                       | High anti-Pa Ab titers after 3rd immunisation; BALF inflammatory cell counts and lung damage sig. reduced (50-70%) in peptide-KLH groups compared to KLH alone; pep15-KLH most effective; no sig dif in lung bacterial clearance among groups                                                                                                             | antigen-KLH conjugate (5/7:1)                            | [36] |
|                                           | Non-typeable <i>Haemophilus influenzae</i> (NtHi) immunisation-infection-clearance models using DA and Sprague Dawley rats (n=5/group) immunised mucosally (i.t.) w recombinant lipoprotein peptides (LP) conjugated to KLH, BSA or full-LP protein, and combinations thereof; challenge using 4x NtHi viral strains i.t. or i.b. <sup>8</sup> | Anti-LP IgG, IgA Ab titers were not sig dif. between KLH conjugates and other groups, peptide-full-length conjugate and mixtures resulted in highest titers; KLH conjugation enhanced bacterial clearance compared to BSA conjugates, KLH/BSA alone and naïve mice (P<0.05)                                                                               | 10-20 µg antigen-KLH (NA ratio)                          | [37] |
| Helicidae                                 | Influenza (H3N2) immunisation model using Balb/c mice (n=5-8/group) immunised i.p. w HpH (or PBS) no adjuvants or peptides; other groups immunised w influenza peptide (IP), IP w CFA, IP w alum, IP w HpH, or IP w alum; boosted 2 x; separate tetanus (TT) toxoid model                                                                      | IP+HpH produced high anti-IP Abs (p<0.01 compared to control), though IP w alum most effective (p<0.005); higher cytokine levels w HpH+IP compared to alum+IP (p<0.005); high anti-HpH Abs at all doses (p<0.005); IP+KLH stronger cytotoxicity against infected cells compared to other groups (p<0.0005); strong B and T cell proliferation             | 100 µg HpH*; 50 µg antigen + 100 µg HpH* mixture         | [38] |
| Muricidae <sup>9</sup> ,<br>Fissuerllidae | Influenza immunisation model using Balb/c mice (n=6-8/group) immunised i.p. w commercial flu vaccine (influenza hemagglutinin 15 µg) mixed w RvH or KLH (100 µg) or vaccine in CFA + 2x boosters (or PBS or RvH alone controls)                                                                                                                | Anti-Vac IgM Ab treatments > controls (p<0.0005); IgG significantly higher in the Vac+KLH treated group (p<0.005) and Vac+RvH (p<0.01 compared to Vac, Vac+CFA and PBS); lower cytokine levels (IL4 and IFN-γ) w Vac+KLH and Vac+RtH (p<0.05) (Th1/Th2 immune response); Vac+RvH highest cytotoxicity against infected cells (p<0.01 compared to control) | 15 µg antigen + 100 µg RvH*/KLH mixture                  | [39] |

<sup>7</sup> Also included a separate infection model (same vaccination protocol) for challenge with aerosol *M. tuberculosis* (Erdman strain), though did not use KLH

<sup>8</sup> Also included an NtHi and adenovirus immunisation-infection model using Chinchillas which did not use KLH

<sup>9</sup> *Rapana venosa* originally listed as *R. thomasi* (Crosse 1861)

**Table S4: *In vivo* animal models and human studies using molluscan hemocyanins as a model antigen for research investigating respiratory diseases.**

| Mollusc class<br>Family            | Study type and design <sup>1</sup>                                                                                                                                                                                                                                                                                                                                                                                                                               | Main findings                                                                                                                                                                                                                                                                                                                                                                                         | Effective concentrations <sup>2</sup> | Reference |
|------------------------------------|------------------------------------------------------------------------------------------------------------------------------------------------------------------------------------------------------------------------------------------------------------------------------------------------------------------------------------------------------------------------------------------------------------------------------------------------------------------|-------------------------------------------------------------------------------------------------------------------------------------------------------------------------------------------------------------------------------------------------------------------------------------------------------------------------------------------------------------------------------------------------------|---------------------------------------|-----------|
| <b>Gastropoda</b><br>Fissuerllidae | Model of acute airway inflammation and antioxidant response to nitrated antigens using Balb/c mice (n=3-4/group) sensitised w OVA + alum i.p., challenged i.n. w 50 µg nitrated OVA (nOVA) or nitrated KLH (nKLH) in PBS, or OVA, KLH or PBS alone (controls); challenged w MCh for lung function test                                                                                                                                                           | KLH or nKLH decreased glutathione oxidation and superoxide dismutase gene expression (p<0.05); no lung function abnormalities w KLH or nKLH challenge; increased inflammatory cells (particularly lymphocytes and macrophages) in KLH and nKLH groups (p<0.001); OVA/nOVA produced stronger effects than KLH/nKLH                                                                                     | 50 µg                                 | [40]      |
|                                    | Pulmonary immune response model investigating the role of alveolar macrophages (AM) using (C3D2) F1 mice (n=2-4/group) challenged w 80 µg trinitrophenyl-KLH in PBS i.t. w or w/out 10 µg liposome ClzMDP pre-treatment (for AM elimination)                                                                                                                                                                                                                     | Loss of AMs caused enhanced immune responses- increased antigen presenting cells and prolonged response, increased IgG, IgA and IgE Abs; no increase in response after antigen dose increased >800 µg; AMs have a suppressive role limiting possible damage caused by severe responses in lung tissue                                                                                                 | 80 µg antigen-KLH                     | [41]      |
|                                    | Allergic asthma model investigating the role of IL-1 family cytokines using C129S7(4Get) mice (n=4/group) sensitised i.n. to 100 µg aerosolised KLH (or short ragweed extract) w or w/out 100 ng IL-33 twice before 3x i.n. challenge exposures to KLH; main component of study uses OVA challenge                                                                                                                                                               | IL-33+KLH increased IL-4, IL-5, IL-13 production, BALF inflammatory cell counts and IL-4eGFP expression by CD4+ cells (p<0.01); KLH alone comparable to PBS; IL-33 facilitates sensitisation to antigens producing asthma-like lung changes upon re-exposure; KLH does not induce memory-type immune responses                                                                                        | 100 µg                                | [42]      |
|                                    | Allergic asthma models (x3) using BDF1 mice (n=4-6/group) immunised i.n. w 0.05-5 µg (exp 1) or 0.5-25 µg (exp 2) aerosolised sensitisation proteins including KLH, OVA, subtilin (SUB), beta-lactoglobulin (BLG) and mouse serum albumin (MSA) (saline or naïve mice controls); challenged 29 d later w MCh (exp 1) or sensitisation proteins (exp 2); passive immunisation model using naïve mice immunised w antisera then challenged w proteins i.v. (exp 3) | KLH induced a dose-dependent increase in BALF total cells, eosinophil, macrophage and counts (p<0.05; higher anti-KLH (and other protein) Ab titers w sensitisation treatment (p<0.05); Penh response not sig dif to controls; KLH lowest IgG1:IgG2 ratio (more protective than allergenic); relative immunogenic potency: SUB>OVA≥KLH>BLG>MSA                                                        | 0.5 - 25 µg                           | [43]      |
|                                    | Model investigating the influence of stress on the pulmonary immune response using Wistar rats (n=6/group) primed w 10 µg trinitrophenyl-KLH in saline i.p. subjected to mild electric foot shock stress challenged w 150 µg i.t. TNP-KLH; assays 10 d later                                                                                                                                                                                                     | Higher anti-TNP Ab titers w stress treatment (p<0.05); acute emotional stress can contribute to the onset or severity of allergic asthma by lowering the threshold of induction of antigen-specific IgE production in the lungs                                                                                                                                                                       | 10 µg antigen-KLH                     | [44]      |
|                                    | Model of inherited pulmonary immunity post lung transplant using Beagle dogs (n=8 total); donors sensitised w 10 mg KLH instilled into left cardiac lung lobe (and control lobe), repeated KLH challenge; lungs transplanted 6 d after challenge; Abs monitored                                                                                                                                                                                                  | Anti-KLH IgG, IgM, IgA Abs produced in recipient, gradually declining over 15 d; IgA and IgG continued to be produced by the donor for as long as 320 d; immune cells from asthmatic donor lungs could confer asthmatic responses in recipients                                                                                                                                                       | 10 mg sens, 1mg challenge             | [45]      |
|                                    | <i>In vivo</i> human study of 9 atopic asthma patients (+ 9 healthy subjects) immunised w 500 µg KLH injected into superior lingula division of lung (and control lobe) to characterise normal vs atypical immune function                                                                                                                                                                                                                                       | Abs higher for asthmatic group, IgG4 sig (p<0.05), consistent w a Th2 response; serum/BALF Ab levels correlated (p<0.05); no sig dif in inflammatory cell counts; higher IgA1, IgM Abs in immunised lobe (p<0.05); >MCh reactivity in asthmatics; no adverse effects of KLH treatment                                                                                                                 | 500 µg                                | [46]      |
|                                    | <i>In vivo</i> human study involving 51 healthy atopic subjects (likely to develop allergy) (n=4-8/group) sensitised w 0.1, 10, 1000 or 100 000 µg KLH (day 0) w successive 100 µg doses (day 14, 28) w or w/out adjuvant diesel exhaust particles (DEPs) (0.3mg) (day 1, 13 and 27) all delivered i.n. over 33-d study period                                                                                                                                   | IgE decreased w increasing sensitisation dose (p<0.003); no specific IgE in 0.1 µg group; all developed detectable IgG and IgG4 Abs, sig higher for 100,000 µg group; IgE:IgG/IgG4 ratios decreased w increasing dose (p=0.0004); high dose overcame proallergic adjuvant effects of DEPs; initial high dose exposure to KLH is more likely to result in allergic tolerance rather than sensitisation | 10-100,000 µg sens, 100 µg challenge  | [47]      |
|                                    | <i>In vivo</i> human study involving 25 healthy atopic subjects challenged w 0.3mg DEPs i.n. 24 hr before aerosol KLH administration i.n. (1 mg or 100 µg in 200 µL saline), or KLH w/out prior DEP exposure, 3 x over 32-d study period                                                                                                                                                                                                                         | Abs elevated after 14-d and w each subsequent challenge; IgG and IgA similar in DEP+KLH and KLH alone, IgG4 and IgE higher in DEP+KLH (p<0.01); IgE did not occur w/out DEP pre-treatment; IL-4 increased w DEP+KLH, otherwise cytokines not sig different compared to pre-immunisation; DEP drives sensitisation to KLH in atopic subjects under conditions when KLH alone does not have this effect | 1 mg or 100 µg                        | [48]      |
|                                    | <i>In vivo</i> human study involving healthy atopic and normal subjects (5 groups re normal, atopic or history of respiratory disease/allergy, n=10-14/group) treated w 300 µg aerosol KLH weekly administered via nebuliser over 2 mo + 600 µg booster or; monthly i.d. injections of 20 or 2 µg KLH and monthly i.c. injections of 22 µg KLH for skin tests                                                                                                    | Skin reactivity higher in subjects w existing allergy/family history of respiratory disease (61% aerosol, 53% i.d.) compared to normal (25% aerosol, 30% i.d.) after 2 mo (p<0.05); developed more quickly in atopics (after 1 month); normal and atopic individuals develop skin hypersensitivity to KLH after repeated exposure, particularly to i.n. aerosol administration; no adverse symptoms   | 300 µg aerosol or 2-20 µg i.d.        | [49]      |

Abbreviations: Ab: antibody; Hc: hemocyanin; w: with; KLH: keyhole limpet hemocyanin; PBS: phosphate buffer solution; OVA: ovalbumin; MCh: methacholine (bronchoconstrictor); BALF: bronchoalveolar lavage fluid; ELISA: enzyme-linked immunosorbent assay; DEPs: diesel exhaust particles; TNP: trinitrophenyl.

<sup>1</sup> Administration routes: s.c.- subcutaneous, i.p.- intraperitoneal, i.n.- intranasal, p.o.- per oral

<sup>2</sup> All hemocyanins derived from hemolymph; KLH laboratory grade, HpH experimentally purified

|           |                                                                                                                                                                                                                                                                        |                                                                                                                                                                                                                                                                                                                                 |                  |      |
|-----------|------------------------------------------------------------------------------------------------------------------------------------------------------------------------------------------------------------------------------------------------------------------------|---------------------------------------------------------------------------------------------------------------------------------------------------------------------------------------------------------------------------------------------------------------------------------------------------------------------------------|------------------|------|
|           | <i>In vivo</i> human study of 10 cancer patients including those w bronchial and nasopharynx carcinoma (plus 14 normal subjects) immunised s.c. w 0.01, 0.1 or 5 mg KLH                                                                                                | KLH induced non-specific lymphocyte stimulation independent of dose in cancer patients and controls; Ab and lymphocyte response sig depressed in advanced disease (Group 2); KLH can assist in cancer treatment during which chemotherapy or the disease itself can impair the immune response                                  | 0.01 - 5 mg KLH* | [50] |
|           | <i>In vivo</i> human study of 12 asthmatic children immunised s.c. w 320 µgN (~2 mg protein) KLH (0 and 14 d), 6 children receiving prednisolone (+ other steroid) treatment; also included 2 adult men immunised w 100 µgN KLH (0 d), 40 µgN (day 14), 350 µgN (44 d) | All subjects produced anti-KLH Ab titers; steroid treatment had no effect on antibody levels formed; no delayed hypersensitivity skin reactions or adverse reactions to mollusc food                                                                                                                                            | 2 mg KLH*        | [51] |
|           | Asthma model using Balb/c mice (n=7-10/group) immunised s.c. w 100 µg KLH and separately w fused/non-fused Fc proteins (5 mg/kg) (or proteins alone) challenged w 0.5% aerosol OVA and treated w Fc proteins i.p. (5 mg/kg) (KLH not used for challenge)               | KLH with protein immunisation elicited a stronger anti-KLH immune response than protein alone; strongest effects on anti-KLH IgM, IgG and IgG1 Abs, lymphocytes, IL-10 and IFN-γ; B7RP-1-Fc identified as stimulant (>cytokine, inflammatory cell and anti-KLH Ab expression); CTLA-4 identified as suppressant (<anti-KLH Abs) | 100 µg KLH       | [52] |
| Helicidae | <i>In vivo</i> human study of 11 asthmatic patients (and 10 normal subjects) immunised s.c. w 1.0 mg HpH, monitored over 32 d                                                                                                                                          | IgE and IgG Ab titers sig higher in asthmatics (p<0.01); IgM higher at 7 d (p<0.05) and IgA generally higher though not sig; increased humoral responsiveness of asthmatic patients is not restricted to the IgE class                                                                                                          | 1.0 mg HpH*      | [53] |
|           | <i>In vivo</i> human study of 30 patients w squamous cell bronchial carcinoma and 15 w chronic bronchitis (smokers w no carcinoma as controls) immunised w 1 mg HpH s.c. at time of diagnosis                                                                          | Advanced disease stages showed sig lower IgA and IgG Ab responses (=0.001), IgM not different from controls; Stage I and III disease lower lymphocyte transformation (p<0.01); SQBC causes impaired humoral and cellular immune responses and a defective Ab response                                                           | 1mg HpH*         | [54] |
|           | <i>In vivo</i> human study of 11 asthma patients (plus 9 healthy subjects) immunised s.c. w 1 mg HpH                                                                                                                                                                   | Blood hydrocortisone higher in asthmatics (not sig); hydrocortisone had an inhibitory effect on HpH-induced lymphocyte proliferation; endogenous hydrocortisone plays an important immunosuppressive role in asthma                                                                                                             | 1mg HpH*         | [55] |

**Table S5: Selected patents relating to pharmaceutical compounds derived from molluscs for the treatment of respiratory disease.**

| Class Family         | Derivative part                          | Specific extract/compound                                                                                                                                 | Bioactivity                                                | Related respiratory disease                                    | Patent title                                                                                                                                                                                                                                                                                                                                                                                                                                                                                                                                                                         | Country, patent ID                                                                                                                                                |
|----------------------|------------------------------------------|-----------------------------------------------------------------------------------------------------------------------------------------------------------|------------------------------------------------------------|----------------------------------------------------------------|--------------------------------------------------------------------------------------------------------------------------------------------------------------------------------------------------------------------------------------------------------------------------------------------------------------------------------------------------------------------------------------------------------------------------------------------------------------------------------------------------------------------------------------------------------------------------------------|-------------------------------------------------------------------------------------------------------------------------------------------------------------------|
| <b>Bivalvia</b>      |                                          |                                                                                                                                                           |                                                            |                                                                |                                                                                                                                                                                                                                                                                                                                                                                                                                                                                                                                                                                      |                                                                                                                                                                   |
| Mactridae            | NA                                       | Spisulosine and related compounds                                                                                                                         | Anticancer                                                 | Lung cancer; ORI                                               | "Spisulosine compounds."                                                                                                                                                                                                                                                                                                                                                                                                                                                                                                                                                             | United States. US6800661B1 (2004)                                                                                                                                 |
| Mytilidae            | Body                                     | Lipid extract                                                                                                                                             | Anti-inflammatory                                          | Asthma; pulmonary inflammation and allergy                     | a) "A product containing anti-inflammatory principles from green mussel <i>Perna viridis</i> L. and a process thereof."<br>b) "Lipid extract of mussels and method for preparation thereof"<br>c) "An extract"                                                                                                                                                                                                                                                                                                                                                                       | a) India. IP2066/CHE/2010 (2013)<br>b) International. WO2006128244A1 (2006)<br>c) International. WO2008075978A2. (2008)                                           |
|                      | Hemolymph                                | Mytilin                                                                                                                                                   | Antiviral                                                  | Viral infection                                                | "Mytilin as well as preparation method and application thereof in preparation of medicines and feed additives"                                                                                                                                                                                                                                                                                                                                                                                                                                                                       | China. CN104418946A (2015)                                                                                                                                        |
| <b>Gastropoda</b>    |                                          |                                                                                                                                                           |                                                            |                                                                |                                                                                                                                                                                                                                                                                                                                                                                                                                                                                                                                                                                      |                                                                                                                                                                   |
| Aplysiidae           | Body                                     | Dolastatin 10, 15 and related compounds (e.g. Tasidotin, Elisidepsin, Soblidotin)                                                                         | Anticancer                                                 | Lung cancer                                                    | a) "Derivatives of Dolastatin 10 and auristatins."<br>b) "Three-dimensional structure of new antitumor agent Soblidotin."                                                                                                                                                                                                                                                                                                                                                                                                                                                            | a) United States. US20160083420A1 (2016)<br>b) Japan. JP2004262799A (2004)                                                                                        |
|                      |                                          | Vedotin compounds                                                                                                                                         | Anticancer                                                 | Lung cancer                                                    | a) "Carrier-binding agent compositions and methods of making and using the same."                                                                                                                                                                                                                                                                                                                                                                                                                                                                                                    | a) Australia. AU2016308337A1. (2019)                                                                                                                              |
| Fissurellidae        | Hemolymph                                | Hemocyanin                                                                                                                                                | Immunomodulatory (cancer vaccine conjugate), antimicrobial | ORI; lung cancer                                               | a) "Adjuvant enhanced immunotherapy."<br>b) "Composition for delivering bioactive agents for immune response and its preparation."<br>c) "Preparation methods for a novel generation of biological safe KLH products used for cancer treatment, for the development of conjugated therapeutic vaccines and as challenging agents."<br>d) "Purified hemocyanin obtained from <i>Fissurella latimarginata</i> , <i>F. cumingi</i> or <i>F. maxima</i> ; subunit of purified hemocyanin; use of hemocyanin, its subunit or immunogenic fragments and compositions containing the same." | a) Australia. AU2003224989B2 (2008)<br>b) United States. US6024983A (2000)<br>c) International. WO/2015/188868 (2019)<br>d) United States. US20100255017A1 (2009) |
| Haliotidae           | Hemolymph                                | Hemocyanin or crude hemolymph                                                                                                                             | Antiviral                                                  | Viral infection (including rhinovirus, influenza, common cold) | "Anti-viral nutraceutical."                                                                                                                                                                                                                                                                                                                                                                                                                                                                                                                                                          | International. WO2009129561A1 (2009)                                                                                                                              |
| Muricidae            | Hemolymph                                | Hemocyanin (specific subunits or extract)                                                                                                                 | Immunomodulatory (cancer vaccine conjugate), antimicrobial | ORI; lung cancer                                               | a) "Product and composition containing a <i>Concholepas concholepas</i> hemocyanin (cch) subunit a, and a method of use thereof."<br>b) "Hemocyste extract loco ( <i>Concholepas concholepas</i> ) with antimicrobial activity, pharmaceutical composition comprising said extract; method for producing the extract; use of the extract that serves food additive or aids to retain and prevent contamination with microorganisms."                                                                                                                                                 | a) International. WO2005014647A1 (2005)<br>b) Chile. CL2013000660A1. (2013)                                                                                       |
|                      | Hypobranchial gland (also in egg masses) | Indirubin and indole derivatives (e.g. indirubin-3'-oxime; 3',6-substituted indirubins [6-BIO]; 6-(3-phenylpropyl) amino-2-benzoxazolone; 'Natura'; E804) | Anticancer, antimicrobial, anti-inflammatory               | ORI; lung cancer; pulmonary inflammation and allergy           | a) "Indole derivatives as anti-allergy and anti-inflammatory agents."<br>b) "Derivatives of isoindigo, indigo and indirubin and methods of treating cancer."<br>c) "3',6-substituted indirubins and their biological applications."<br>d) "Methods and pharmaceutical compositions for inhibiting influenza viruses replication."                                                                                                                                                                                                                                                    | a) United States. 5290788 (1994)<br>b) United States. US6933315B2 (2005)<br>c) United States. US8829203B2 (2014)<br>d) United States. US9168236B2. (2015)         |
| Muricidae, Helicidae | Hemolymph                                | Hemocyanin (specific subunits or extract)                                                                                                                 | Antimicrobial                                              | ORI                                                            | a) "A biologically active commodity."<br>b) "Bio components from snails."                                                                                                                                                                                                                                                                                                                                                                                                                                                                                                            | a) Bulgaria. BG110495A (2011)<br>b) Bulgaria. BG110665A (2011)                                                                                                    |
| Plakobranchidae      | Body                                     | Kahaladide F (and related compounds)                                                                                                                      | Anticancer and antiviral                                   | Lung cancer (and viral infections)                             | "Cytotoxic and antiviral compound."                                                                                                                                                                                                                                                                                                                                                                                                                                                                                                                                                  | Europe. EP0610078A1 (1994)                                                                                                                                        |

Abbreviations: ORI: opportunistic respiratory infection

**Table S6:** Classes of purified compounds tested against respiratory pathogens, cancers and inflammatory diseases.

| Purified compound                                                                                                                                   | Compound class                       | Bioactivity                                  | Reference                                          |
|-----------------------------------------------------------------------------------------------------------------------------------------------------|--------------------------------------|----------------------------------------------|----------------------------------------------------|
| 3 protamine-like proteins                                                                                                                           | Protein                              | Antibacterial                                | [56]                                               |
| Myticin, Myticin B, Myticin C and 9 peptides                                                                                                        | Peptide                              | Antibacterial, antifungal                    | [57], [58]                                         |
| Tartrolon E                                                                                                                                         | Polyketide                           | Antibacterial                                | [59]                                               |
| OctoPartenopin + 6 HPLC fractions + 5 synthesised fractions                                                                                         | Peptide                              | Antibacterial                                | [60]                                               |
| Mytimicin-AF                                                                                                                                        | Peptide                              | Antibacterial                                | [61]                                               |
| Conotoxin MVIIA and 9 analogues                                                                                                                     | Peptide                              | Antibacterial                                | [62]                                               |
| 5'-deoxy-5'-methylthio-adenosine (MTA) + two naturally-occurring analogues (xylo-MTA, xylo-A)                                                       | Protein                              | Antibacterial                                | [63]                                               |
| Scutinin A and B                                                                                                                                    | Polyketide                           | Antibacterial                                | [64]                                               |
| Purified Hc from <i>Helix aspera</i> ( $\beta$ c-HaH subunit + 8 functional units)                                                                  | Glycoprotein, peptide                | Antibacterial                                | [65]                                               |
| Purified Hc from <i>Rapana venosa</i> (RvH), glycosylated (RvH-c) + non-glycosylated (RvH-b) subunits + 4 functional units and 11 protein fractions | Glycoprotein, protein, peptide       | Antiviral                                    | [66], [67], [68]                                   |
| Purified Hc from <i>Helix pomatia</i> (HpH)                                                                                                         | Glycoprotein                         | Anticancer, immunomodulatory                 | [68]                                               |
| Tyriverdin, tyrindoleninone, Tyrian purple, 6-bromoisatin                                                                                           | Brominated indole/isatin derivatives | Antibacterial, anticancer, anti-inflammatory | [69], [70]                                         |
| Dolabellin B2                                                                                                                                       | Peptide                              | Antibacterial                                | [71],                                              |
| 2 sialic acid-binding lectin recombinant proteins (rSgSABL-1, -2)                                                                                   | Protein                              | Antibacterial, immunomodulatory              | [72]                                               |
| Kahalalide F and derivatives (e.g. Elisidepsin/PM02734, KZ1, KZ2)                                                                                   | Peptide                              | Antibacterial, antifungal, anticancer        | [73], [74], [75], [76], [77], [78], [79, 80], [81] |
| 7,8-dideoxygriseorhodin C                                                                                                                           | Aromatic polyketide                  | Antibacterial                                | [82]                                               |
| Four mucus fractions (PUFA 39, 40, 49, 50)                                                                                                          | Fatty acid derivative                | Antiviral                                    | [83]                                               |
| Three mucus fractions (PUFA 39, 40, 49)                                                                                                             | Fatty acid derivative                | Antiviral                                    | [84]                                               |
| Spisulosine                                                                                                                                         | Amino acid                           | Anticancer                                   | [85]                                               |
| Tumor necrosis factor (CgTNF-2)                                                                                                                     | Protein                              | Anticancer                                   | [86]                                               |
| (NH <sub>4</sub> ) <sub>2</sub> SO <sub>4</sub> fractionated peptide ('Mere15')                                                                     | Peptide                              | Anticancer                                   | [87]                                               |
| Experimentally purified Hc (HpH)                                                                                                                    | Glycoprotein                         | Anticancer                                   | [38]                                               |
| 'Lyprinol'                                                                                                                                          | Lipid formulation                    | Anti-inflammatory                            | [88], [89], [90], [91]                             |
| Heparin sulfate analog (HS)                                                                                                                         | Polysaccharide                       | Anticancer                                   | [92]                                               |
| Dolastatin-10 and derivatives (e.g. Solibidotin/TZT-1027)                                                                                           | Peptide                              | Anticancer                                   | [93], [94]                                         |

Abbreviations: Hc: hemocyanin; PUFA: polyunsaturated fatty acid.

## References

1. Alves, R. R.; Alves, H. N., The faunal drugstore: animal-based remedies used in traditional medicines in Latin America. *J Ethnobiol Ethnomed* 2011, 7, (1), 9.
2. Kim, H.; Song, M. J., Ethnozoological study of medicinal animals on Jeju Island, Korea. *J Ethnopharmacol* 2013, 146, (1), 75-82.
3. Brieger, J. E., *Calcarea carbonica* or *Ostrea edulis*? *Br Homeopath J* 1960, 49, (01), 41-43.
4. Ramchandani, N. M., Homoeopathic treatment of upper respiratory tract infections in children: evaluation of thirty case series. *Complement Ther Clin Pract* 2010, 16, (2), 101-108.
5. Colin, P., Homeopathy and respiratory allergies: a series of 147 cases. *Homeopathy* 2006, 95, (2), 68-72.
6. Gopal, R.; Vijayakumaran, M.; Venkatesan, R.; Kathirolu, S., Marine organisms in Indian medicine and their future prospects. *Indian J Nat Prod Resour* 2008, 7, (2), 139-145.
7. Alves, R. R.; Rosa, I. L., Zootherapeutic practices among fishing communities in North and Northeast Brazil: a comparison. *J Ethnopharmacol* 2007, 111, (1), 82-103.
8. Meyer-Rochow, V. B., Therapeutic arthropods and other, largely terrestrial, folk-medicinally important invertebrates: a comparative survey and review. *J Ethnobiol Ethnomed* 2017, 13, (1).
9. Voultziadou Eleni, E., Therapeutic properties and uses of marine invertebrates in the ancient Greek world and early Byzantium. *J Ethnopharmacol* 2010, 130, (2), 237-247.
10. Alade, G. O.; Frank, A.; Ajibesin, K. K., Animals and animal products as medicines: a survey of Epie-Atissa and Ogbia people of Bayelsa State, Nigeria. *J Pharm Pharmacogn Res* 2018, 6, (6), 483-502.
11. Jamir, N.; Lal, P., Ethnozoological practices among Naga tribes. *Indian J Trad Knowl* 2005, 4, (1), 100-104.
12. Meyerhof, M.; Sobhy, G. P., The abridged version of "The Book of Simple Drugs", of Ahmad Ibn Muhammad Al-Ghafiqi by Gregorius Abul-Farag. Al Ettemad Printing Press and Publising House: Cairo, Egypt, 1932; p 224-228.
13. Liang, X.; Wang, J.; Guan, R.; Zhao, L.; Li, D.; Long, Z.; Yang, Q.; Xu, J.; Wang, Z.; Xie, J.; Lu, W., *Limax* extract ameliorates cigarette smoke-induced chronic obstructive pulmonary disease in mice. *Int Immunopharmacol* 2018, 54, 210-220.
14. Bonnemain, B., *Helix* and drugs: snails for western health care from antiquity to the present. *Evid Based Complement Alternat Med* 2005, 2, (1), 25-28.
15. Chinlapianga, M.; Singh, R. K.; Shukla, A. C., Ethnozoological diversity of Northeast India: empirical learning with traditional knowledge holders of Mizoram and Arunachal Pradesh. *Indian J Trad Knowl* 2013, 12, (1), 18-30.
16. Nongmaithem, B. D.; Mouatt, P.; Smith, J.; Rudd, D.; Russell, M.; Sullivan, C.; Benkendorff, K., Volatile and bioactive compounds in opercula from Muricidae molluscs supports their use in ceremonial incense and traditional medicines. *Sci Rep* 2017, 7, (1), 1-14.
17. McHugh, J., *Blattes de byzance* in India: mollusk opercula and the history of perfumery. *J R Asiat Soc* 2013, 23, (1), 53-67.
18. Lev, E.; Zohar, A., Practical materia medica of the Medieval Eastern Mediterranean according to the Cairo Genizah (Vol 7). Brill Online Books and Journals: Leiden, The Netherlands, 2008.
19. Sun, B. N.; Shen, H. D.; Wu, H. X.; Yao, L. X.; Cheng, Z. Q.; Diao, Y., Determination of chemical constituents of the marine pulmonate slug, *Paraoncidium reevesii*. *Tropic J Pharm Res* 2014, 13, (12), 2071-2074.
20. Alves, R. R.; Rosa, I. L., Zotherapy goes to town: the use of animal-based remedies in urban areas of NE and N Brazil. *J Ethnopharmacol* 2007, 113, (3), 541-555.
21. Prabhakar, A. K.; Roy, S. P., Ethno-medicinal uses of some shell fishes by people of Kosi river basin of North-Bihar, India. *Studies on Ethno-Medicine* 2009, 3, (1), 1-4.
22. Guan, H.; Wang, S., Chinese Marine Materia Medica. Shanghai Scientific and Technical Publishers, China Ocean Press, and Chemical Industry Press: Shanghai, Beijing, China, 2009; p 371.
23. Dickler, M. N.; Ragupathi, G.; Liu, N. X.; Musselli, C.; Martino, D. J.; Miller, V. A.; Kris, M. G.; Brezicka, F. T.; Livingston, P. O.; Grant, S. C., Immunogenicity of a fucosyl-GM1-keyhole limpet hemocyanin conjugate vaccine in patients with small cell lung cancer. *Clin Cancer Res* 1999, 5, (10), 2773-2779.
24. Demoly, P.; Persi, L.; Dhivert, H.; Delire, M.; Bousquet, J., Immunotherapy with keyhole limpet hemocyanin-conjugated decapeptide vaccine in cypress pollen allergy. *Clin Exp Allergy* 2002, 32, (7), 1071-1076.
25. Miles, D.; Roché, H.; Martin, M.; Perren, T. J.; Cameron, D. A.; Glaspy, J.; Dodwell, D.; Parker, J.; Mayordomo, J.; Tres, A.; Murray, J. L.; Ibrahim, N. K., Phase III multicenter clinical trial of the sialyl-TN (STn)-keyhole limpet hemocyanin (KLH) vaccine for metastatic breast cancer. *Oncologist* 2011, 16, (8), 1092-1100.
26. Hasumi, K.; Aoki, Y.; Watanabe, R.; Hankey, K. G.; Mann, D. L., Therapeutic response in patients with advanced malignancies treated with combined dendritic cell-activated T cell based immunotherapy and intensity-modulated radiotherapy. *Cancers (Basel)* 2011, 3, (2), 2223-2242.
27. Hou, Y.; Gu, X.-X., Development of peptide mimotopes of lipooligosaccharide from nontypeable *Haemophilus influenzae* as vaccine candidates. *J Immunol* 2003, 170, (8), 4373-4379.

28. Hughes, E. E.; Gilleland, L. B.; Gilleland Jr, H. E., Synthetic peptides representing epitopes of outer membrane protein F of *Pseudomonas aeruginosa* that elicit antibodies reactive with whole cells of heterologous immunotype strains of *P. aeruginosa*. *Infect Immun* 1992, 60, (9), 3497-3503.
29. Hughes, E. E.; Gilleland Jr, H. E., Ability of synthetic peptides representing epitopes of outer membrane protein F of *Pseudomonas aeruginosa* to afford protection against *P. aeruginosa* infection in a murine acute pneumonia model. *Vaccine* 1995, 13, (18), 1750-1753.
30. Tan, H. X.; Jegaskanda, S.; Juno, J. A.; Esterbauer, R.; Wong, J.; Kelly, H. G.; Liu, Y.; Tilmanis, D.; Hurt, A. C.; Yewdell, J. W.; Kent, S. J.; Wheatley, A. K., Subdominance and poor intrinsic immunogenicity limit humoral immunity targeting influenza HA stem. *J Clin Invest* 2019, 129, (2), 850-862.
31. Wallmann, J.; Epstein, M. M.; Singh, P.; Brunner, R.; Szalai, K.; El-Housseiny, L.; Pali-Schöll, I.; Jensen-Jarolim, E., Mimotope vaccination for therapy of allergic asthma: anti-inflammatory effects in a mouse model. *Clin Exp Allergy* 2010, 40, (4), 650-658.
32. Sen-Kilic, E.; Blackwood, C. B.; Boehm, D. T.; Witt, W. T.; Malkowski, A. C.; Bevere, J. R.; Wong, T. Y.; Hall, J. M.; Bradford, S. D.; Varney, M. E.; Damron, F. H.; Barbier, M., Intranasal peptide-based fpva-klh conjugate vaccine protects mice from *Pseudomonas aeruginosa* acute murine pneumonia. *Front Immunol* 2019, 10, (OCT).
33. Shin, H. J.; Franco, L. H.; Nair, V. R.; Collins, A. C.; Shiloh, M. U., A baculovirus-conjugated mimotope vaccine targeting *Mycobacterium tuberculosis* lipoarabinomannan. *PLoS One* 2017, 12, (10).
34. Tebbey, P. W.; Hagen, M.; Hancock, G. E., Atypical pulmonary eosinophilia is mediated by a specific amino acid sequence of the attachment (G) protein of respiratory syncytial virus. *J Exp Med* 1998, 188, (10), 1967-1972.
35. Theilacker, C.; Coleman, F. T.; Mueschenborn, S.; Llosa, N.; Grout, M.; Pier, G. B., Construction and characterization of a *Pseudomonas aeruginosa* mucoid exopolysaccharide-alginate conjugate vaccine. *Infect Immun* 2003, 71, (7), 3875-3884.
36. Sokol, P. A.; Kooi, C.; Hodges, R. S.; Cachia, P.; Woods, D. E., Immunization with a *Pseudomonas aeruginosa* elastase peptide reduces severity of experimental lung infections due to *P. aeruginosa* or *Burkholderia cepacia*. *J Infect Dis* 2000, 181, (5), 1682-1692.
37. Kyd, J. M.; Cripps, A. W.; Novotny, L. A.; Bakaletz, L. O., Efficacy of the 26-kilodalton outer membrane protein and two P5 fimbria-derived immunogens to induce clearance of nontypeable *Haemophilus influenzae* from the rat middle ear and lungs as well as from the chinchilla middle ear and nasopharynx. *Infect Immun* 2003, 71, (8), 4691-4699.
38. Gesheva, V.; Chausheva, S.; Stefanova, N.; Mihaylova, N.; Doumanova, L.; Idakieva, K.; Tchorbanov, A., Helix pomatia hemocyanin - a novel bio-adjuvant for viral and bacterial antigens. *Int Immunopharmacol* 2015, 26, (1), 162-168.
39. Gesheva, V.; Idakieva, K.; Kerekov, N.; Nikolova, K.; Mihaylova, N.; Doumanova, L.; Tchorbanov, A., Marine gastropod hemocyanins as adjuvants of non-conjugated bacterial and viral proteins. *Fish Shellfish Immunol* 2011, 30, (1), 135-142.
40. Hochscheid, R.; Schreiber, N.; Kotte, E.; Weber, P.; Cassel, W.; Yang, H.; Zhang, Y.; Pöschl, U.; Müller, B., Nitration of protein without allergenic potential triggers modulation of antioxidant response in type II pneumocytes. *J Toxicol Environ Health - Part A: Current Issues* 2014, 77, (12), 679-695.
41. Thepen, T.; Van Rooijen, N.; Kraal, G., Alveolar macrophage elimination in vivo is associated with an increase in pulmonary immune response in mice. *J Exp Med* 1989, 170, (2), 499-509.
42. Kobayashi, T.; Iijima, K.; Checkel, J. L.; Kita, H., IL-1 family cytokines drive Th2 and Th17 cells to innocuous airborne antigens. *Am J Respir Cell Mol Biol* 2013, 49, (6), 989-998.
43. Krieger, S. M.; Boverhof, D. R.; Woolhiser, M. R.; Hotchkiss, J. A., Assessment of the respiratory sensitization potential of proteins using an enhanced mouse intranasal test (MINT). *Food Chem Toxicol* 2013, 59, 165-176.
44. Persoons, J. H. A.; Berkenbosch, F.; Schornagelb, K.; Thepen, T.; Kraal, G., Increased specific IgE production in lungs after the induction of acute stress in rats. *J Allergy Clin Immunol* 1995, 95, (3), 765-770.
45. Bice, D. E.; Williams, A. J.; Muggenburg, B. A., Long-term Antibody Production in Canine Lung Allografts: Implications in Pulmonary Immunity and Asthma. *Am J Respir Cell Mol Biol* 1996, 14, (4), 341-347.
46. Schuyler, M.; Lyons, C. R.; Masten, B.; Bice, D., Immunoglobulin response to intrapulmonary immunization of asthmatics. *Immunol* 1997, 91, (2), 167-175.
47. Riedl, M. A.; Landaw, E. M.; Saxon, A.; Diaz-Sanchez, D., Initial high-dose nasal allergen exposure prevents allergic sensitization to a neoantigen. *J Immunol* 2005, 174, (11), 7440-7445.
48. Diaz-Sanchez, D.; Garcia, M. P.; Wang, M.; Jyrala, M.; Saxon, A., Nasal challenge with diesel exhaust particles can induce sensitization to a neoallergen in the human mucosa. *J Allergy Clin Immunol* 1999, 104, (6), 1183-1188.
49. Salvaggio, J.; Castro-Murillo, E.; Kundur, V., Immunologic response of atopic and normal individuals to keyhole limpet hemocyanin. *J Allergy* 1969, 44, (6), 344-354.
50. Curtis, J. E.; Hersh, E. M.; Harris, J. E.; McBride, C.; Freireich, E. J., The human primary immune response to keyhole limpet hemocyanin: interrelationships of delayed hypersensitivity, antibody response and in vitro blast transformation. *Clin Exp Immunol* 1970, 6, (4), 473-491.



51. Tuchinda, M.; Newcomb, R. W.; DeVald, B. L., Effect of prednisone treatment on the human immune response to keyhole limpet hemocyanin. *Int Arch Allergy Immunol* 1972, 42, (4), 533-544.
52. Guo, J.; Stolina, M.; Bready, J. V.; Yin, S.; Horan, T.; Yoshinaga, S. K.; Senaldi, G., Stimulatory effects of B7-related protein-1 on cellular and humoral immune responses in mice. *J Immunol* 2001, 166, (9), 5578-5584.
53. Weller, F. R.; Kallenberg, C. G. M.; Jansen, H. M.; Torensma, R.; Klaassen, R. J. L.; Weller, H. H.; Orié, N. G. M.; The, T. H., The primary immune response in bronchial asthma. I. A kinetic study of elix pomatia hemocyanin-specific IgE, IgG, IgA, and IgM antibody responses in patients with asthma and in matched controls. *J Allergy Clin Immunol* 1985, 76, (1), 29-34.
54. Jansen, H. M.; The, T. H.; de Gast, G. C.; Esselink, M. T.; Pastoor, G.; Orié, N. G., The primary immune response of patients with different stages of squamous-cell bronchial carcinoma. *Thorax* 1978, 33, (6), 755-760.
55. Weller, F. R.; Weller, H. H.; Kallenberg, C. G. M.; The, T. H.; Orié, N. G. M., Sensitivity to hydrocortisone is a relevant factor in the immunoendocrine relationship. I. The cell-mediated immune response in relation to blood levels and in vitro immunosuppressive effects of hydrocortisone in patients with asthma and healthy control subjects. *J Allergy Clin Immunol* 1986, 78, (3 PART 1), 423-430.
56. Notariale, R.; Basile, A.; Montana, E.; Romano, N. C.; Cacciapuoti, M. G.; Aliberti, F.; Gesuele, R.; De Ruberto, F.; Sorbo, S.; Tenore, G. C.; Guida, M.; Good, K. V.; Ausio, J.; Piscopo, M., Protamine-like proteins have bactericidal activity: the first evidence in *Mytilus galloprovincialis*. *Acta Biochim Pol* 2018, 65, (4), 585-594.
57. Domeneghetti, S.; Franzoi, M.; Damiano, N.; Norante, R.; M. El Halfawy, N.; Mammi, S.; Marin, O.; Bellanda, M.; Venier, P., Structural and antimicrobial features of peptides related to Myticin C, a special defense molecule from the Mediterranean mussel *Mytilus galloprovincialis*. *J Agric Food Chem* 2015, 63, (42), 9251-9259.
58. Mitta, G.; Hubert, F.; Noel, T.; Roch, P., Myticin, a novel cysteine-rich antimicrobial peptide isolated from haemocytes and plasma of the mussel *Mytilus galloprovincialis*. *Eur J Biochem* 1999, 265, (1), 71-78.
59. Elshahawi, S. I.; Trindade-Silva, A. E.; Hanora, A.; Han, A. W.; Flores, M. S.; Vizzoni, V.; Schrago, C. G.; Soares, C. A.; Concepcion, G. P.; Distel, D. L.; Schmidt, E. W.; Haygood, M. G., Boronated tartrolon antibiotic produced by symbiotic cellulose-degrading bacteria in shipworm gills. *Proc Natl Acad Sci U S A* 2013, 110, (4), E295-E304.
60. Maselli, V.; Galdiero, E.; Salzano, A. M.; Scaloni, A.; Maione, A.; Falanga, A.; Naviglio, D.; Guida, M.; Di Cosmo, A.; Galdiero, S., OctoPartenopin: Identification and preliminary characterization of a novel antimicrobial peptide from the suckers of *Octopus vulgaris*. *Mar Drugs* 2020, 18, (8).
61. Zhong, J.; Wang, W.; Yang, X.; Yan, X.; Liu, R., A novel cysteine-rich antimicrobial peptide from the mucus of the snail of *Achatina fulica*. *Peptides* 2013, 39, (1), 1-5.
62. Hemu, X.; Tam, J. P., Macrocyclic antimicrobial peptides engineered from  $\omega$ -conotoxin. *Curr Pharm Des* 2017, 23, (14), 2131-2138.
63. Pani, A.; Marongiu, M. E.; Obino, P.; Gavagnin, M.; La Colla, P., Antimicrobial and antiviral activity of xylosyl-methylthio-adenosine, a naturally occurring analogue of methylthio-adenosine from *Doris verrucosa*. *Experientia* 1991, 47, (11-12), 1228-1229.
64. Chand, S.; Karuso, P., Isolation and total synthesis of two novel metabolites from the fissurellid mollusc *Scutus antipodes*. *Tetrahedron Lett* 2017, 58, (10), 1020-1023.
65. Dolashka, P.; Dolashki, A.; Van Beeumen, J.; Floetenmeyer, M.; Velkova, L.; Stevanovic, S.; Voelter, W., Antimicrobial activity of molluscan hemocyanins from *Helix* and *Rapana* snails. *Curr Pharm Biotechnol* 2016, 17, (3), 263-270.
66. Dolashka-Angelova, P.; Lieb, B.; Velkova, L.; Heilen, N.; Sandra, K.; Nikolaeva-Glomb, L.; Dolashki, A.; Galabov, A. S.; Van Beeumen, J.; Stevanovic, S.; Voelter, W.; Devreese, B., Identification of glycosylated sites in *Rapana* hemocyanin by mass spectrometry and gene sequence, and their antiviral effect. *Bioconj Chem* 2009, 20, (7), 1315-1322.
67. Dolashka, P.; Moshtanska, V.; Borisova, V.; Dolashki, A.; Stevanovic, S.; Dimanov, T.; Voelter, W., Antimicrobial proline-rich peptides from the hemolymph of marine snail *Rapana venosa*. *Peptides* 2011, 32, (7), 1477-1483.
68. Gesheva, V.; Chausheva, S.; Mihaylova, N.; Manoylov, I.; Doumanova, L.; Idakieva, K.; Tchorbanov, A., Anti-cancer properties of gastropodan hemocyanins in murine model of colon carcinoma. *BMC Immunol* 2014, 15, (1).
69. Benkendorff, K.; Bremner, J. B.; Davis, A. R., Tyrian purple precursors in the egg masses of the Australian muricid, *Dicathais orbita*: a possible defensive role. *J Chem Ecol* 2000, 26, (4), 1037-1050.
70. Ahmad, T. B.; Rudd, D.; Benkendorff, K.; Mahdi, L. K.; Pratt, K. A.; Dooley, L.; Wei, C.; Kotiw, M., Brominated indoles from a marine mollusc inhibit inflammation in a murine model of acute lung injury. *PLoS One* 2017, 12, (10).
71. Bitaab, M. A.; Ranaei Siadat, S. O.; Pazooki, J.; Sefidbakht, Y., Antibacterial and molecular dynamics study of the Dolabellanin B2 isolated from sea slug, *Peronia peronii*. *Biosci Biotechnol Res Asia* 2015, 12, (3), 2023-2035.
72. Wei, X. M.; Yang, D. L.; Li, H. Y.; Jiang, H. L.; Liu, X. Q.; Zhang, Q.; Yang, J. L., Sialic acid-binding lectins (SABLs) from *Solen grandis* function as PRRs ensuring immune recognition and bacterial clearance. *Fish Shellfish Immunol* 2018, 72, 477-483.

73. Shilabin, A. G.; Hamann, M. T., In vitro and in vivo evaluation of select kahalalide F analogs with antitumor and antifungal activities. *Bioorg Med Chem* 2007, 19, (22), 6628-6632.
74. Janmaat, M. L.; Rodriguez, J. A.; Jimeno, J.; Kruyt, F. A. E.; Giaccone, G., Kahalalide F induces necrosis-like cell death that involves depletion of ErbB3 and inhibition of Akt signaling. *Mol Pharmacol* 2005, 68, (2), 502-510.
75. Teixidó, C.; Arguelaguet, E.; Pons, B.; Aracil, M.; Jimeno, J.; Somoza, R.; Marés, R.; Ramón Y Cajal, S.; Hernández-Losa, J., ErbB3 expression predicts sensitivity to elisidepsin treatment: in vitro synergism with cisplatin, paclitaxel and gemcitabine in lung, breast and colon cancer cell lines. *Int J Oncol* 2012, 41, (1), 317-324.
76. Ling, Y. H.; Aracil, M.; Jimeno, J.; Perez-Soler, R.; Zou, Y., Molecular pharmacodynamics of PM02734 (elisidepsin) as single agent and in combination with erlotinib; synergistic activity in human non-small cell lung cancer cell lines and xenograft models. *Eur J Cancer* 2009, 45, (10), 1855-1864.
77. Ciavatta, M. L.; Devi, P.; Carbone, M.; Mathieu, V.; Kiss, R.; Casapullo, A.; Gavagnin, M., Kahalalide F analogues from the mucous secretion of Indian sacoglossan mollusc *Elysia ornata*. *Tetrahedron* 2016, 72, (5), 625-631.
78. Pardo, B.; Paz-Ares, L.; Tabernero, J.; Ciruelos, E.; Garcia, M.; Salazar, R.; Lopez, A.; Blanco, M.; Nieto, A.; Jimeno, J.; Izquierdo, M. A.; Trigo, J. M., Phase I clinical and pharmacokinetic study of kahalalide F administered weekly as a 1-hour infusion to patients with advanced solid tumors. *Clin Cancer Res* 2008, 14, (4), 1116-1123.
79. Hamann, M. T., Technology evaluation: Kahalalide F, *PharmaMar*. *Curr Opin Mol Ther* 2004, 6, (6), 657-665.
80. *PharmaMar*, *PharmaMar* reports new data on Kahalalide-F and Aplidin(R) at ESMO congress. Presented at the 31st European Society for Medical Oncology Congress (ESMO); Istanbul, Turkey. September 29 - October 3, 2006., 2006.
81. Salazar, R.; Jones, R. J.; Oaknin, A.; Crawford, D.; Cuadra, C.; Hopkins, C.; Gil, M.; Coronado, C.; Soto-Matos, A.; Cullell-Young, M.; Iglesias Dios, J. L.; Evans, T. R. J., A phase I and pharmacokinetic study of elisidepsin (PM02734) in patients with advanced solid tumors. *Cancer Chemother Pharmacol* 2012, 70, (5), 673-681.
82. Miller, B. W.; Torres, J. P.; Tun, J. O.; Flores, M. S.; Forteza, I.; Rosenberg, G.; Haygood, M. G.; Schmidt, E. W.; Concepcion, G. P., Synergistic anti-methicillin-resistant *Staphylococcus aureus* (MRSA) activity and absolute stereochemistry of 7,8-dideoxygriseorhodin C. *J Antibiot* 2020, 73, 290-298.
83. de Toledo-Piza, A. R.; Figueiredo, C. A.; de Oliveira, M. I.; Negri, G.; Namiyama, G.; Tonelotto, M.; Villar, K. D.; Rofatto, H. K.; Mendonca, R. Z., The antiviral effect of mollusk mucus on measles virus. *Antiviral Res* 2016, 134, 172-181.
84. de Toledo-Piza, A. R.; de Oliveira, M. I.; Negri, G.; Mendonca, R. Z.; Figueiredo, C. A., Polyunsaturated fatty acids from *Phyllocaulis boraceiensis* mucus block the replication of influenza virus. *Arch Microbiol* 2018, 200, (6), 961-970.
85. Silveira-Dorta, G.; Sousa, I. J.; Fernandes, M. X.; Martín, V. S.; Padrón, J. M., Synthesis and identification of unprecedented selective inhibitors of CK1 $\epsilon$ . *Eur J Med Chem* 2015, 96, 308-317.
86. Zheng, Y.; Liu, Z.; Wang, L.; Li, M.; Zhang, Y.; Zong, Y.; Li, Y.; Song, L., A novel tumor necrosis factor in the Pacific oyster *Crassostrea gigas* mediates the antibacterial response by triggering the synthesis of lysozyme and nitric oxide. *Fish Shellfish Immunol* 2020, 98, 334-341.
87. Wang, C.; Liu, M.; Cheng, L.; Wei, J.; Wu, N.; Zheng, L.; Lin, X., A novel polypeptide from *Meretrix meretrix* Linnaeus inhibits the growth of human lung adenocarcinoma. *Exp Biol Med* 2012, 237, (4), 442-450.
88. Wood, L. G.; Hazlewood, L. C.; Foster, P. S.; Hansbro, P. M., Lyprinol reduces inflammation and improves lung function in a mouse model of allergic airways disease. *Clin Exp Allergy* 2010, 40, (12), 1785-1793.
89. Emelyanov, A.; Fedoseev, G.; Krasnoschekova, O.; Abulimity, A.; Trendeleva, T.; Barnes, P. J., Treatment of asthma with lipid extract of New Zealand green-lipped mussel: a randomised clinical trial. *Eur Respir J* 2002, 20, (3), 596-600.
90. Lello, J.; Liang, A.; Robinson, E.; Leutenegger, D.; Wheat, A., Treatment of children's asthma with a lipid extract of the new Zealand green lipped mussel (*Perna canaliculus*) (Lyprinol®)—A double blind, randomized controlled trial in children with moderate to severe chronic obstructive asthma. *Internet J Asthma Allergy Immunol* 2012, 8.
91. Mickleborough, T. D.; Vaughn, C. L.; Shei, R. J.; Davis, E. M.; Wilhite, D. P., Marine lipid fraction PCSO-524™ (Lyprinol®/Omega XL®) of the New Zealand green lipped mussel attenuates hyperpnea-induced bronchoconstriction in asthma. *Respir Med* 2013, 107, (8), 1152-1163.
92. Gomes, A. M.; Kozlowski, E. O.; Borsig, L.; Teixeira, F.; Vladvavsky, I.; Pavao, M. S. G., Antitumor properties of a new non-anticoagulant heparin analog from the mollusk *Nodipecten nodosus*: effect on P-selectin, heparanase, metastasis and cellular recruitment. *Glycobiology* 2015, 25, (4), 386-393.
93. Kobayashi, M.; Natsume, T.; Tamaoki, S.; Watanabe, J.; Asano, H.; Mikami, T.; Miyasaka, K.; Miyazaki, K.; Gondo, M.; Sakakibara, K.; Tsukagoshi, S., Antitumor activity of TZT-1027, a novel dolastatin 10 derivative. *Jap J Cancer Res* 1997, 88, (3), 316-327.
94. Kalemkerian, G. P.; Ou, X.; Adil, M. R.; Rosati, R.; Khouilani, M. M.; Madan, S. K.; Pettit, G. R., Activity of dolastatin 10 against small-cell lung cancer in vitro and in vivo: induction of apoptosis and bcl-2 modification. *Cancer Chemother Pharmacol* 1999, 43, (6), 507-15.
